# Supplementary material for: Synthesis of Novel Dihydropyridothienopyrimidin-4,9-dione Derivatives
Source: MDPI journal article supplement (doi:10.3390/molecules20035074), 2015-03-19

# Supporting Information

|                                                                                            |                |
|--------------------------------------------------------------------------------------------|----------------|
| $^1\text{H}$ - and $^{13}\text{C}$ -NMR spectra of compounds <b>4a</b> and <b>4b</b> ..... | <b>S1–S2</b>   |
| $^1\text{H}$ - and $^{13}\text{C}$ -NMR spectra of compounds <b>5a</b> and <b>5b</b> ..... | <b>S3–S4</b>   |
| $^1\text{H}$ - and $^{13}\text{C}$ -NMR spectra of compounds <b>6a</b> and <b>6b</b> ..... | <b>S5–S6</b>   |
| $^1\text{H}$ - and $^{13}\text{C}$ -NMR spectra of compounds <b>7a</b> and <b>7b</b> ..... | <b>S7–S8</b>   |
| $^1\text{H}$ - and $^{13}\text{C}$ -NMR spectra of compounds <b>8a</b> and <b>8b</b> ..... | <b>S9–S10</b>  |
| $^1\text{H}$ - and $^{13}\text{C}$ -NMR spectra of compounds <b>9a~9h</b> .....            | <b>S11–S18</b> |

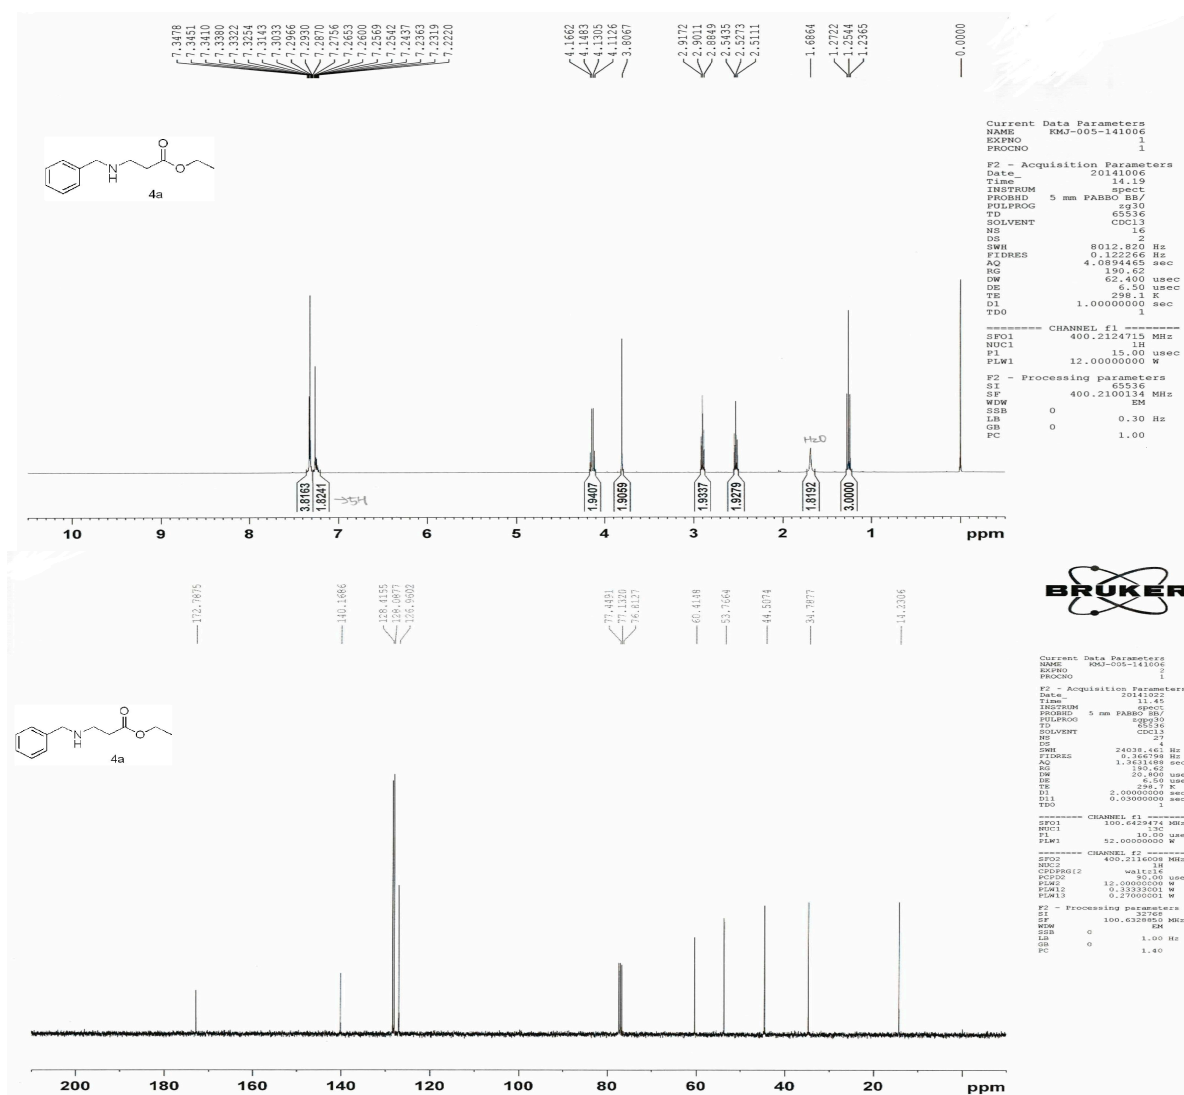

**Figure S1.**  $^1\text{H}$ - (upper) and  $^{13}\text{C}$ -NMR spectra (lower) of compounds **4a**.

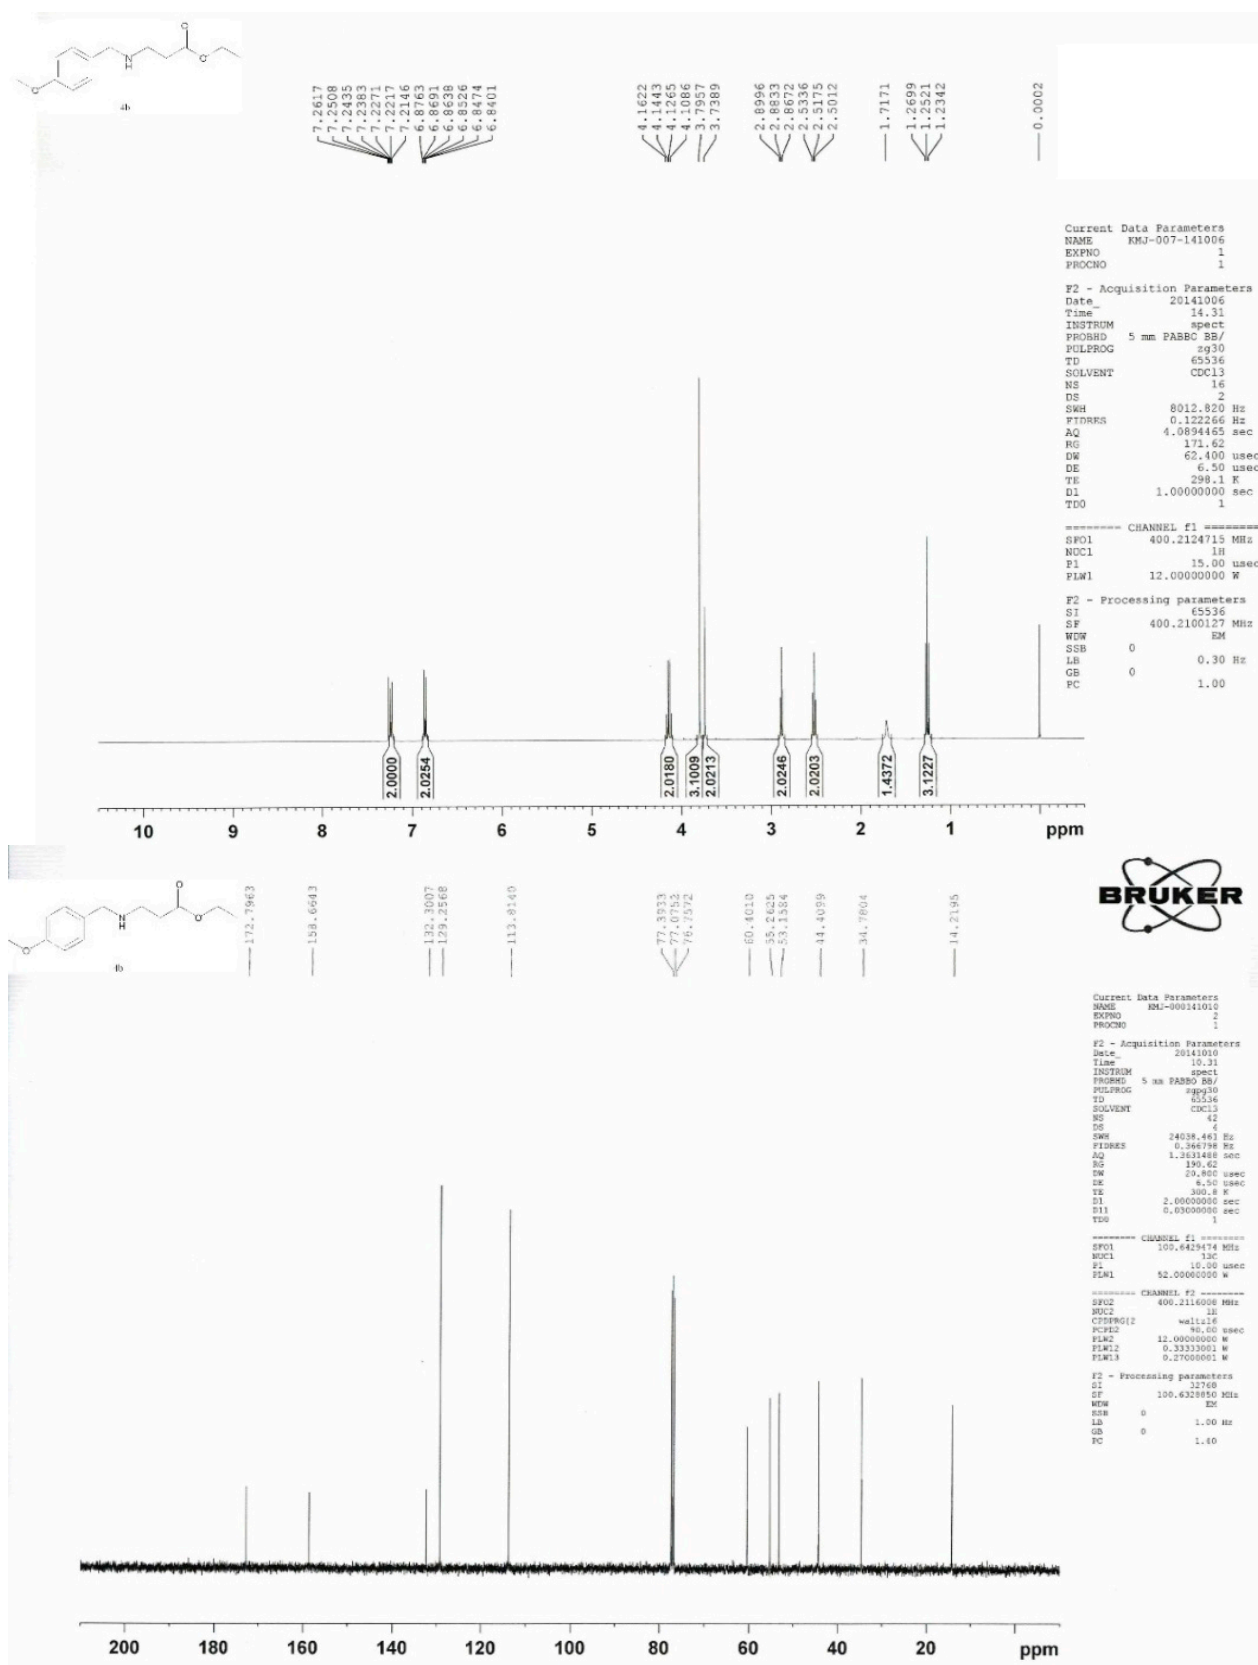

Figure S2.  $^1\text{H}$ - (upper) and  $^{13}\text{C}$ -NMR spectra (lower) of compounds **4b**.

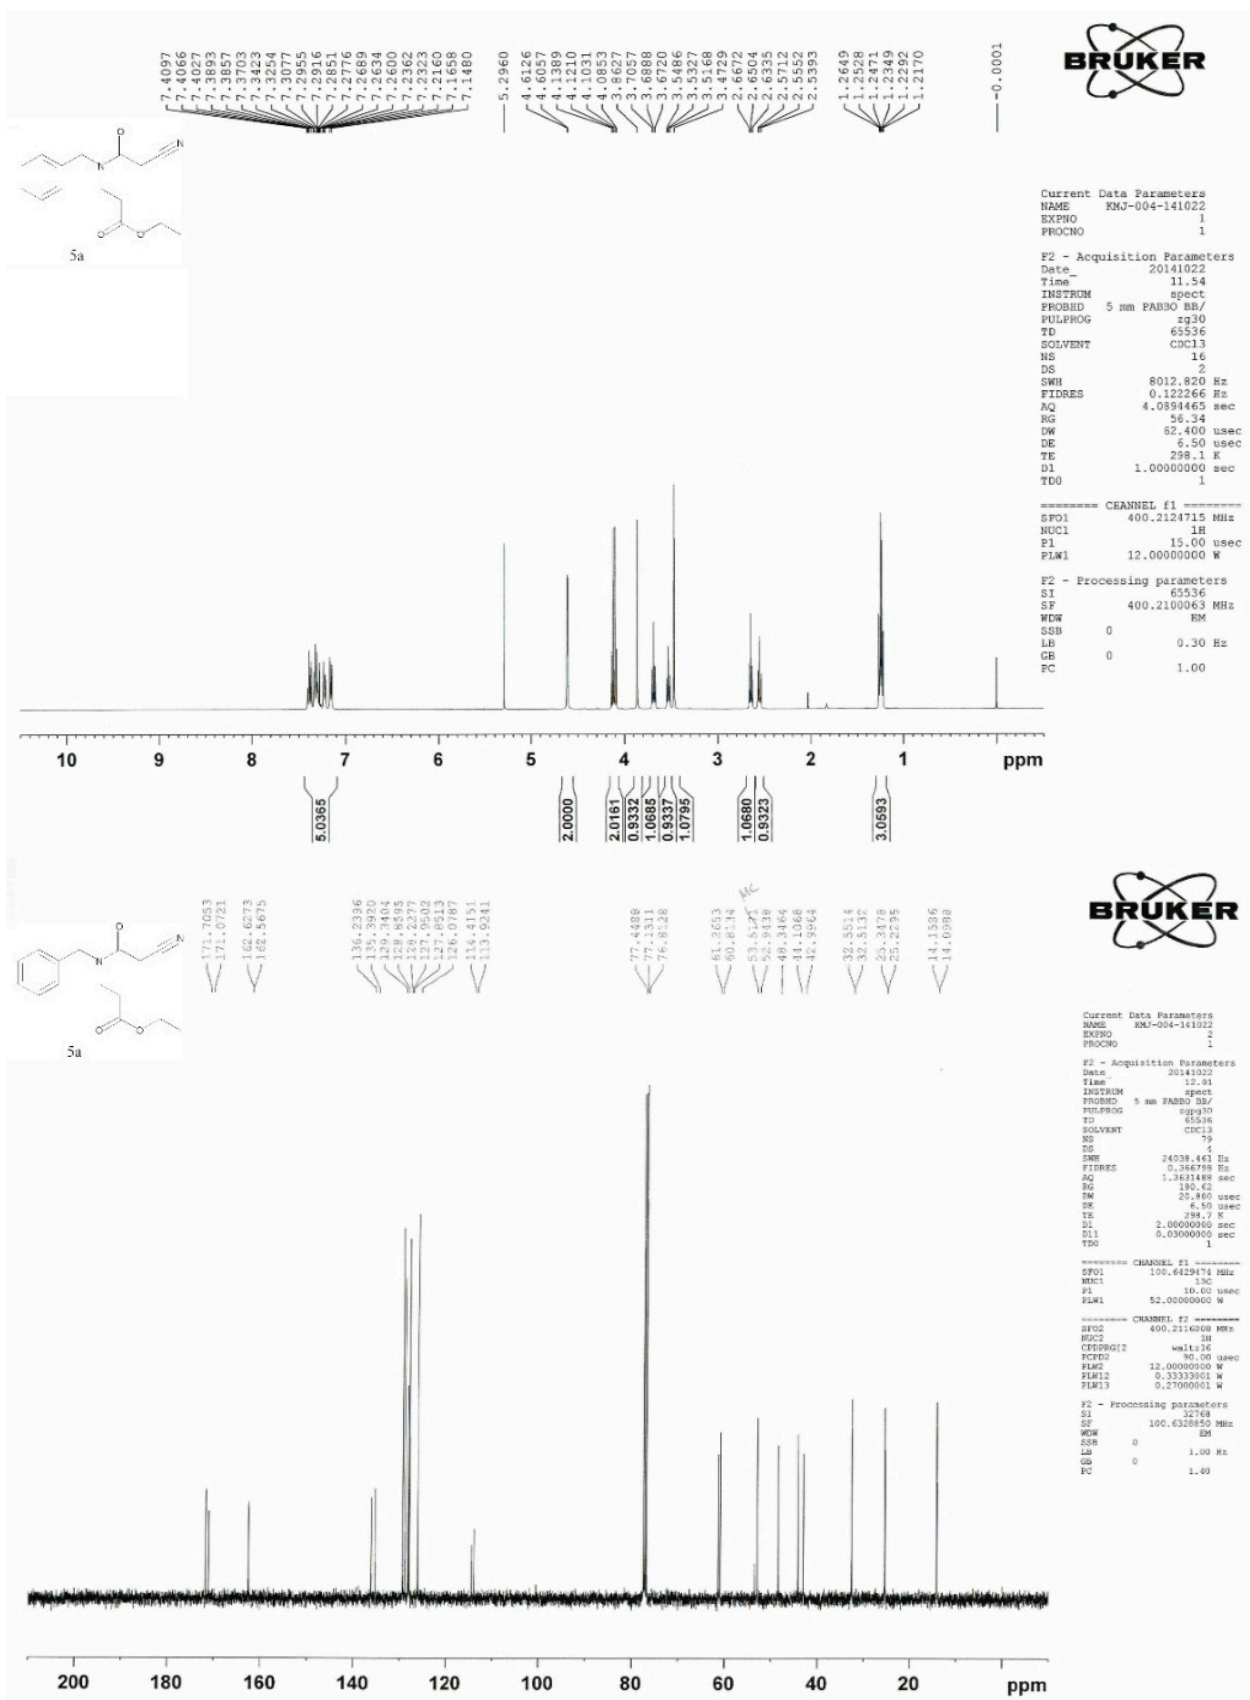

**Figure S3.** <sup>1</sup>H- (upper) and <sup>13</sup>C-NMR spectra (lower) of compounds **5a**.

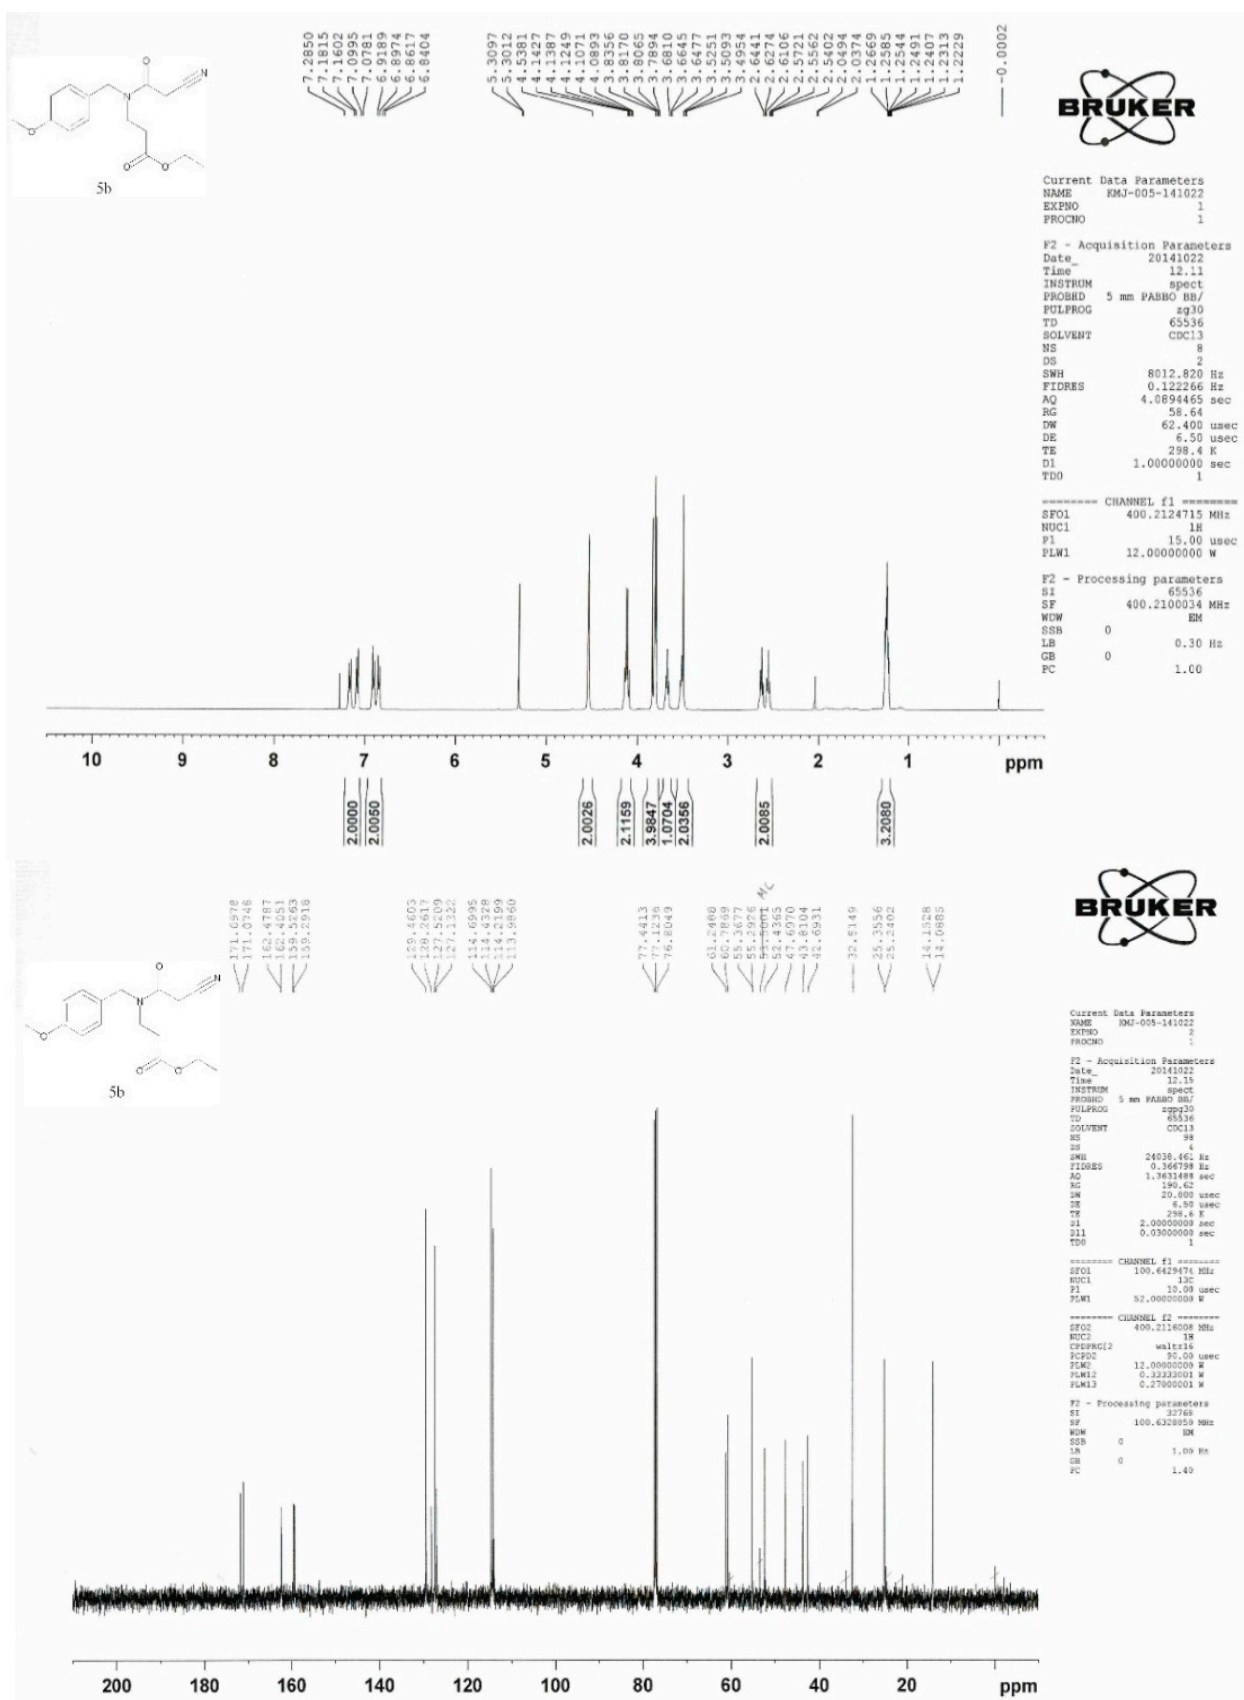

**Figure S4.** <sup>1</sup>H- (upper) and <sup>13</sup>C-NMR spectra (lower) of compounds **5b**.

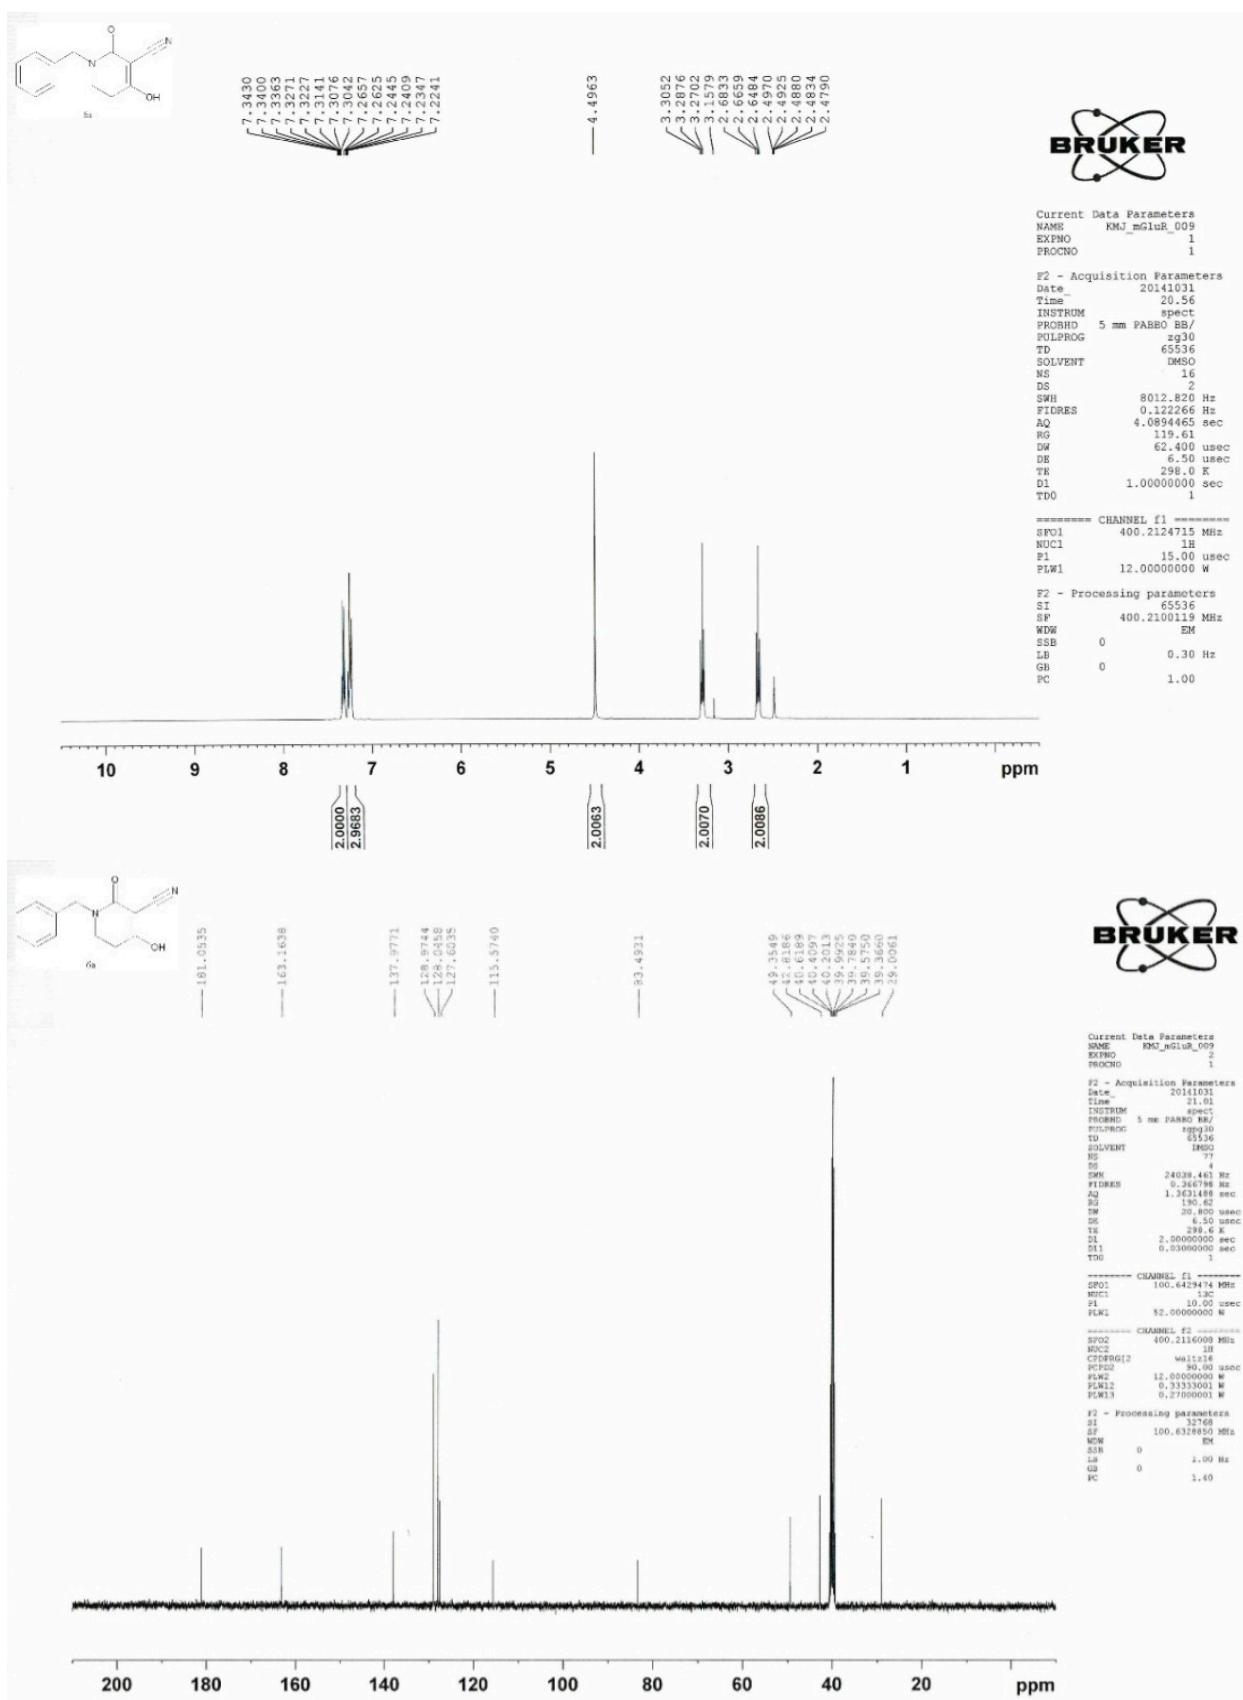

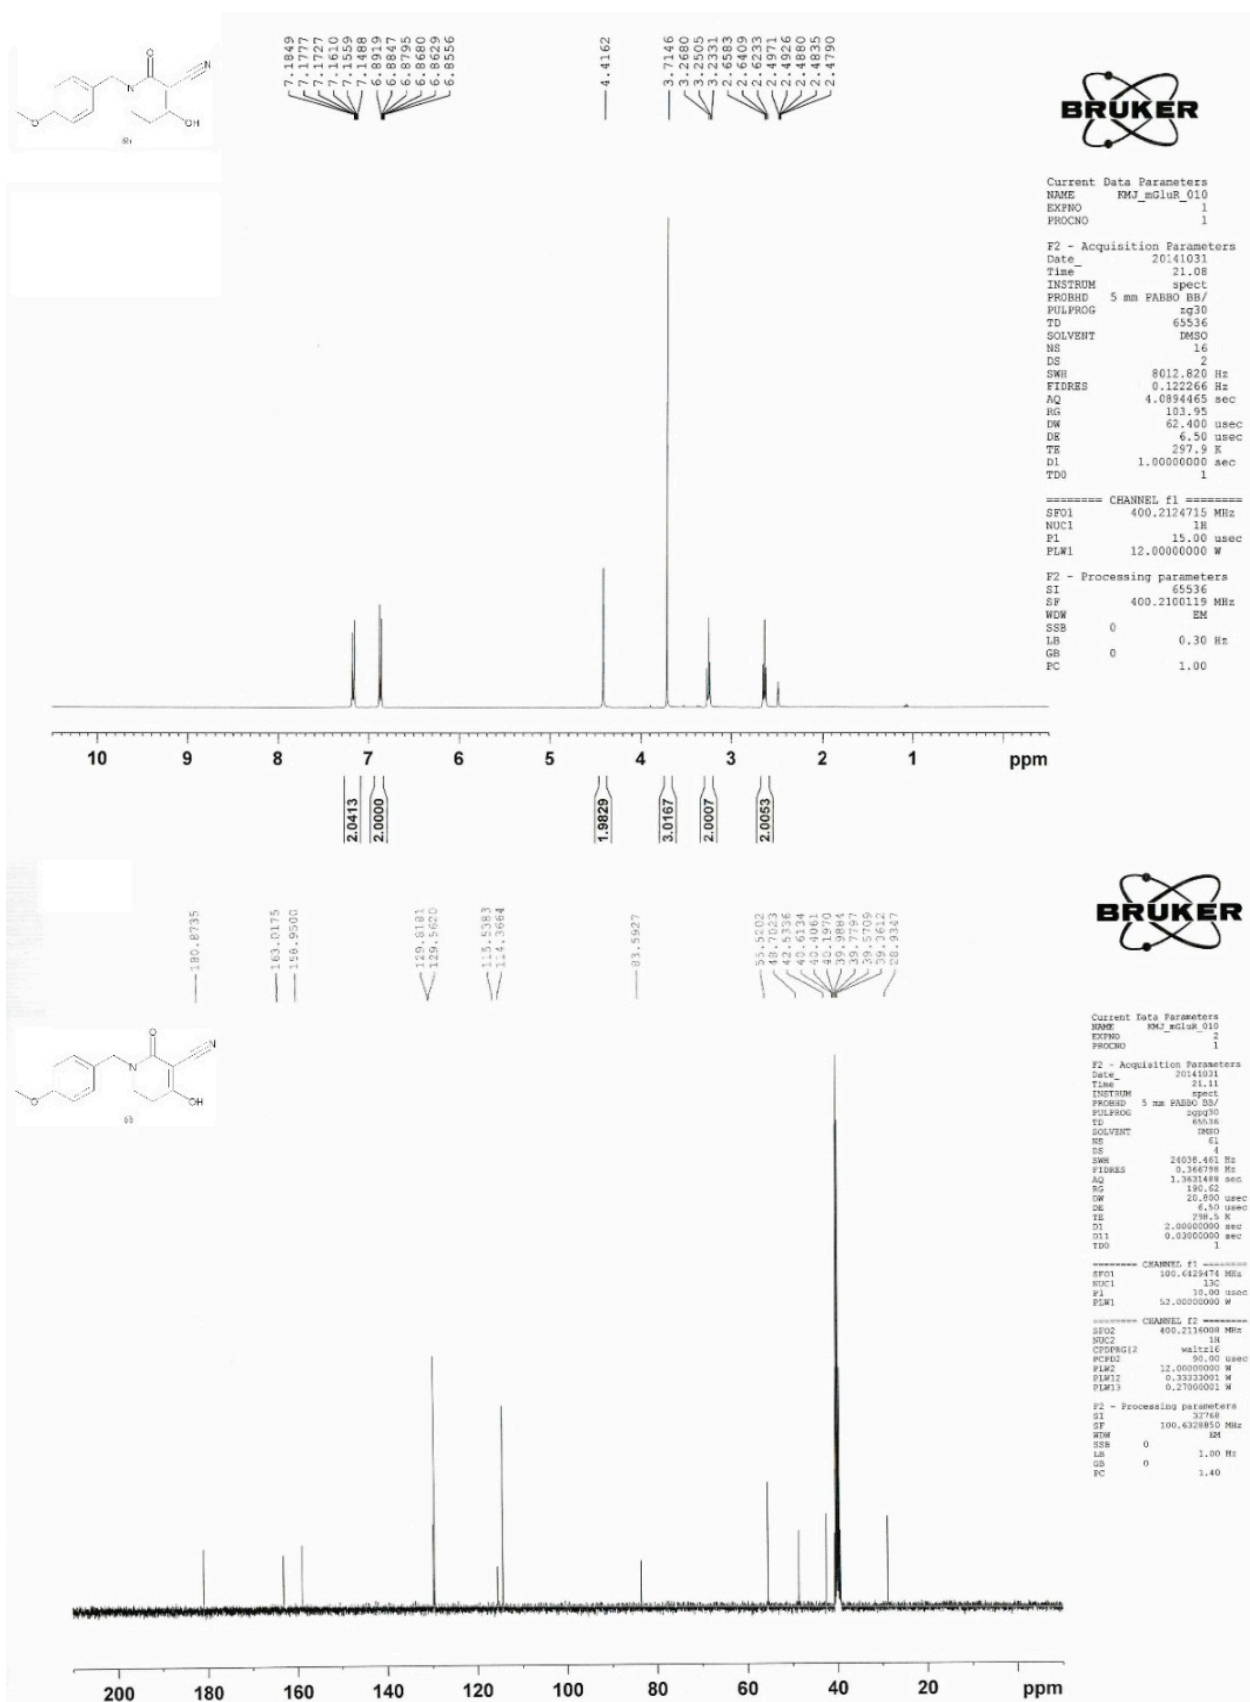

**Figure S6.** <sup>1</sup>H- (upper) and <sup>13</sup>C-NMR spectra (lower) of compounds **6b**.



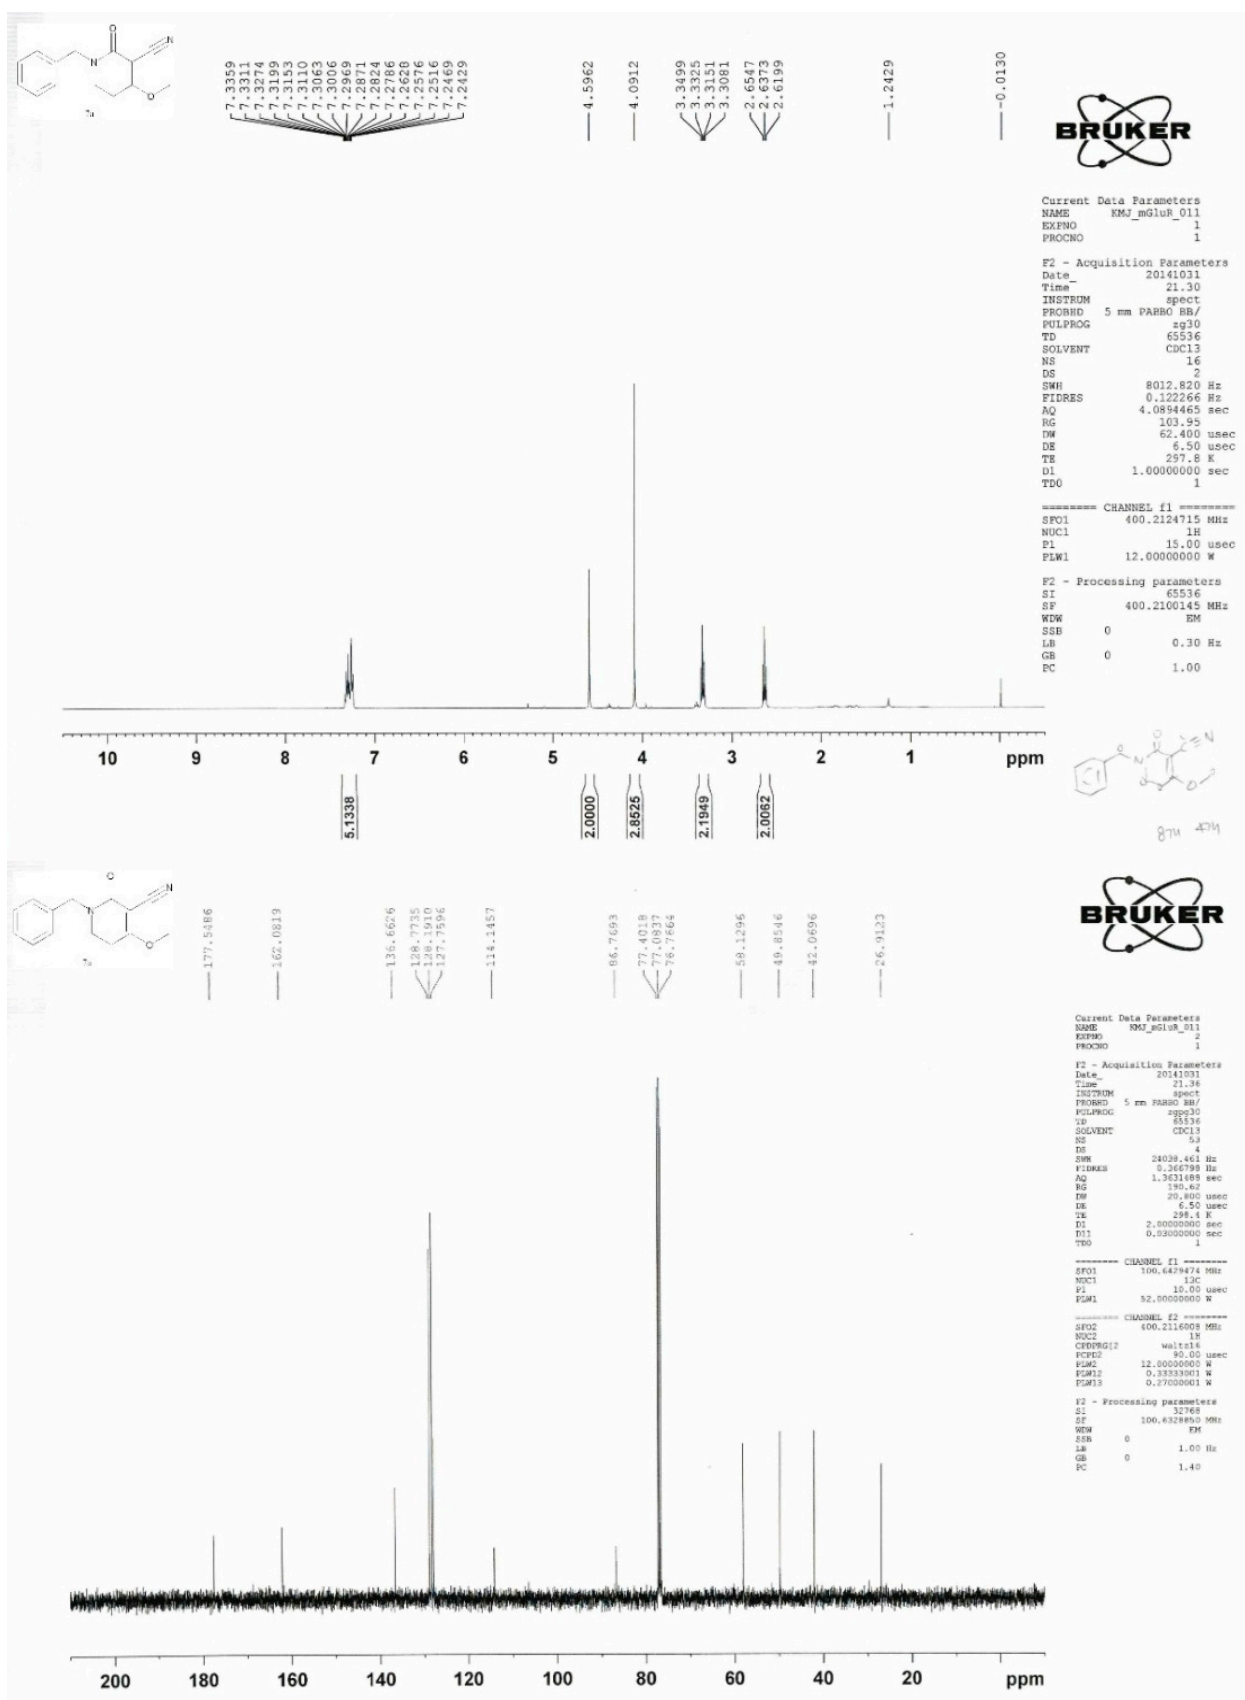

Figure S7. <sup>1</sup>H- (upper) and <sup>13</sup>C-NMR spectra (lower) of compounds 7a.

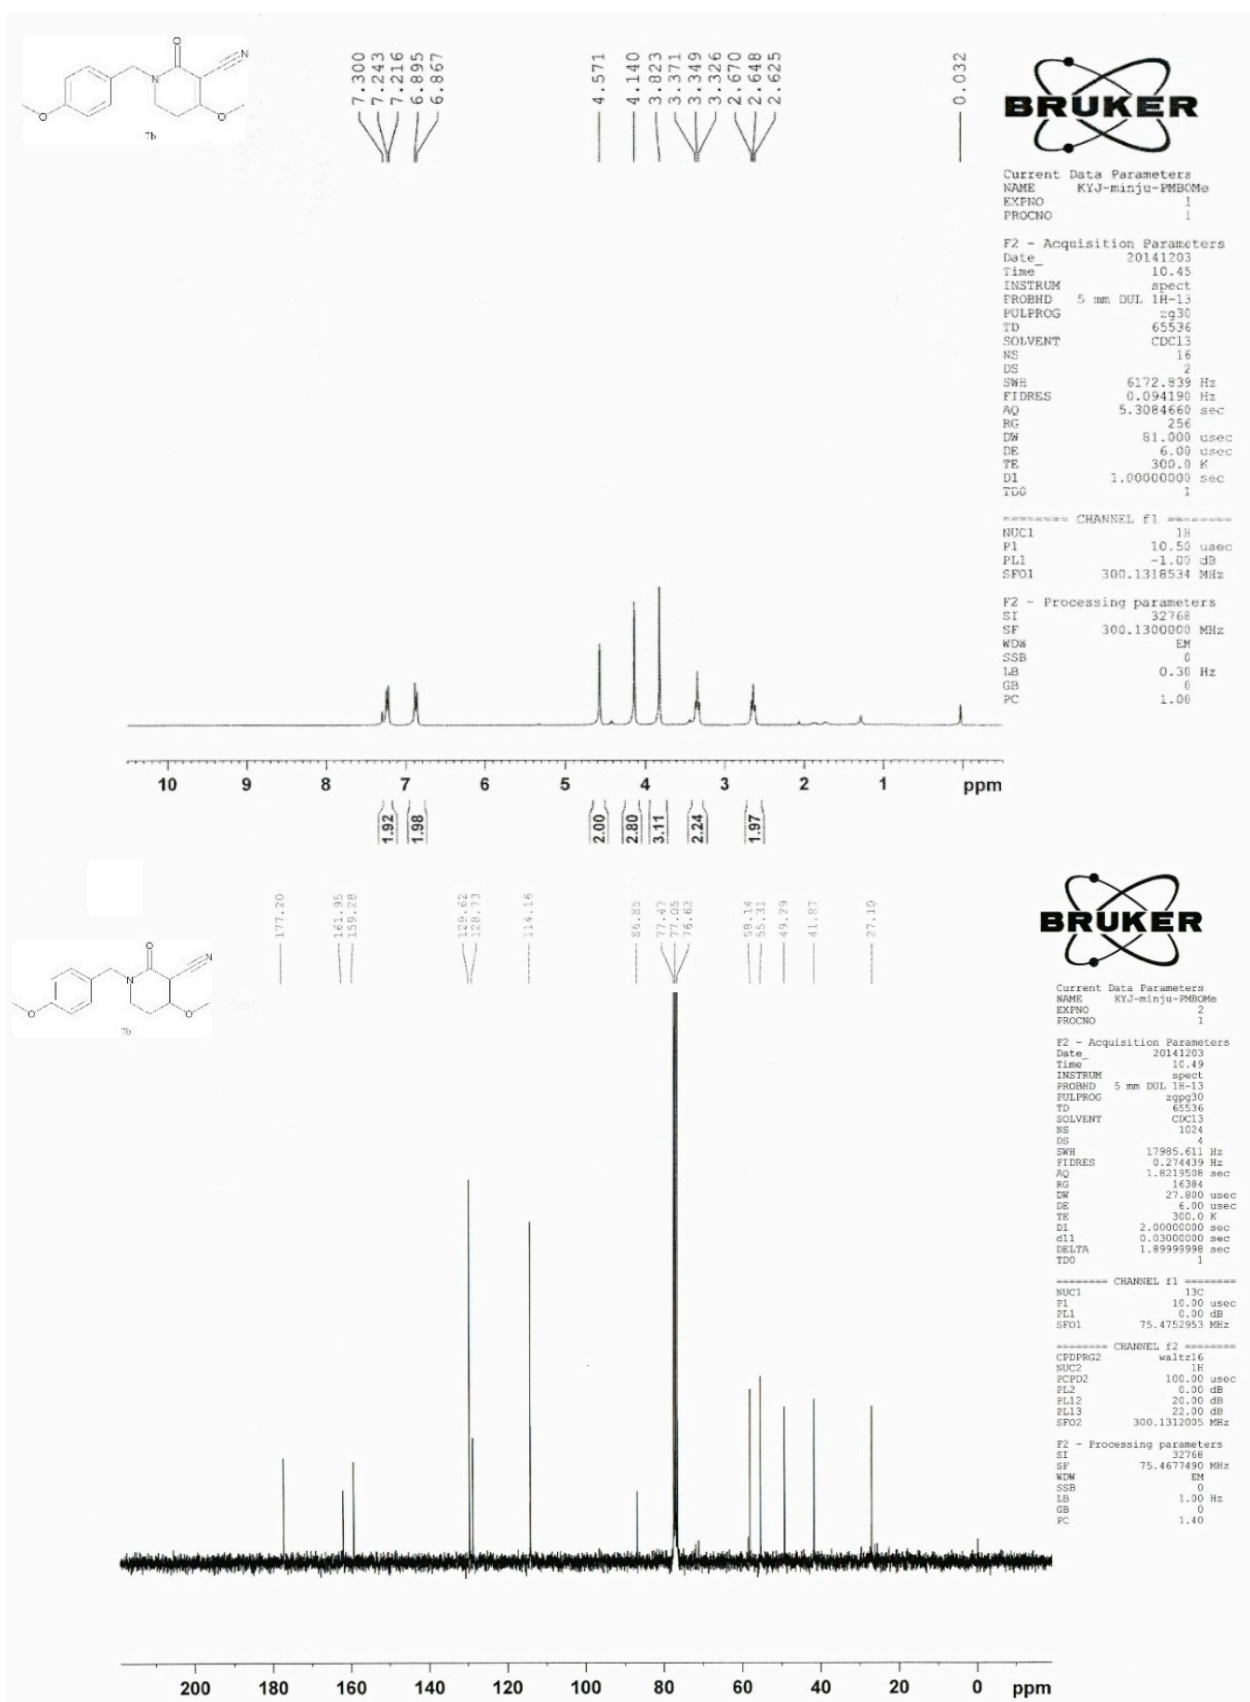



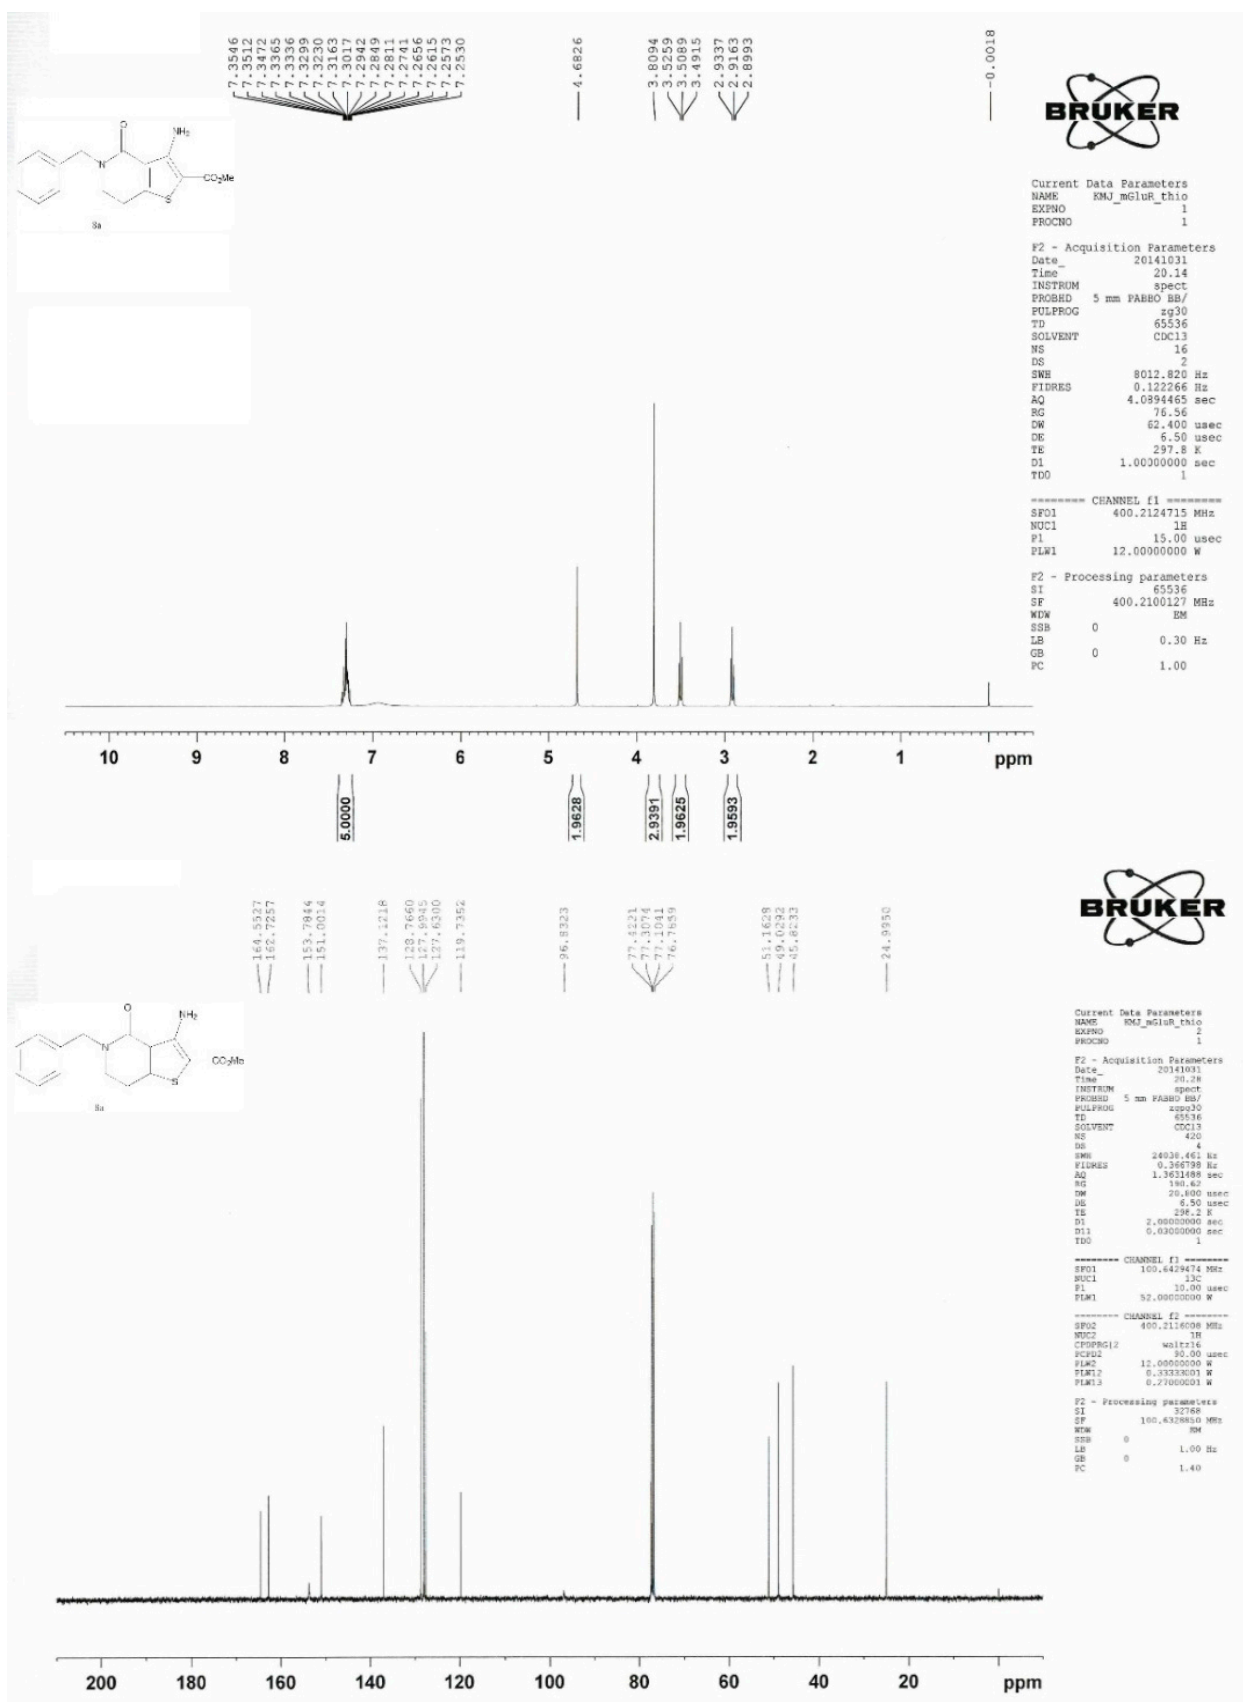

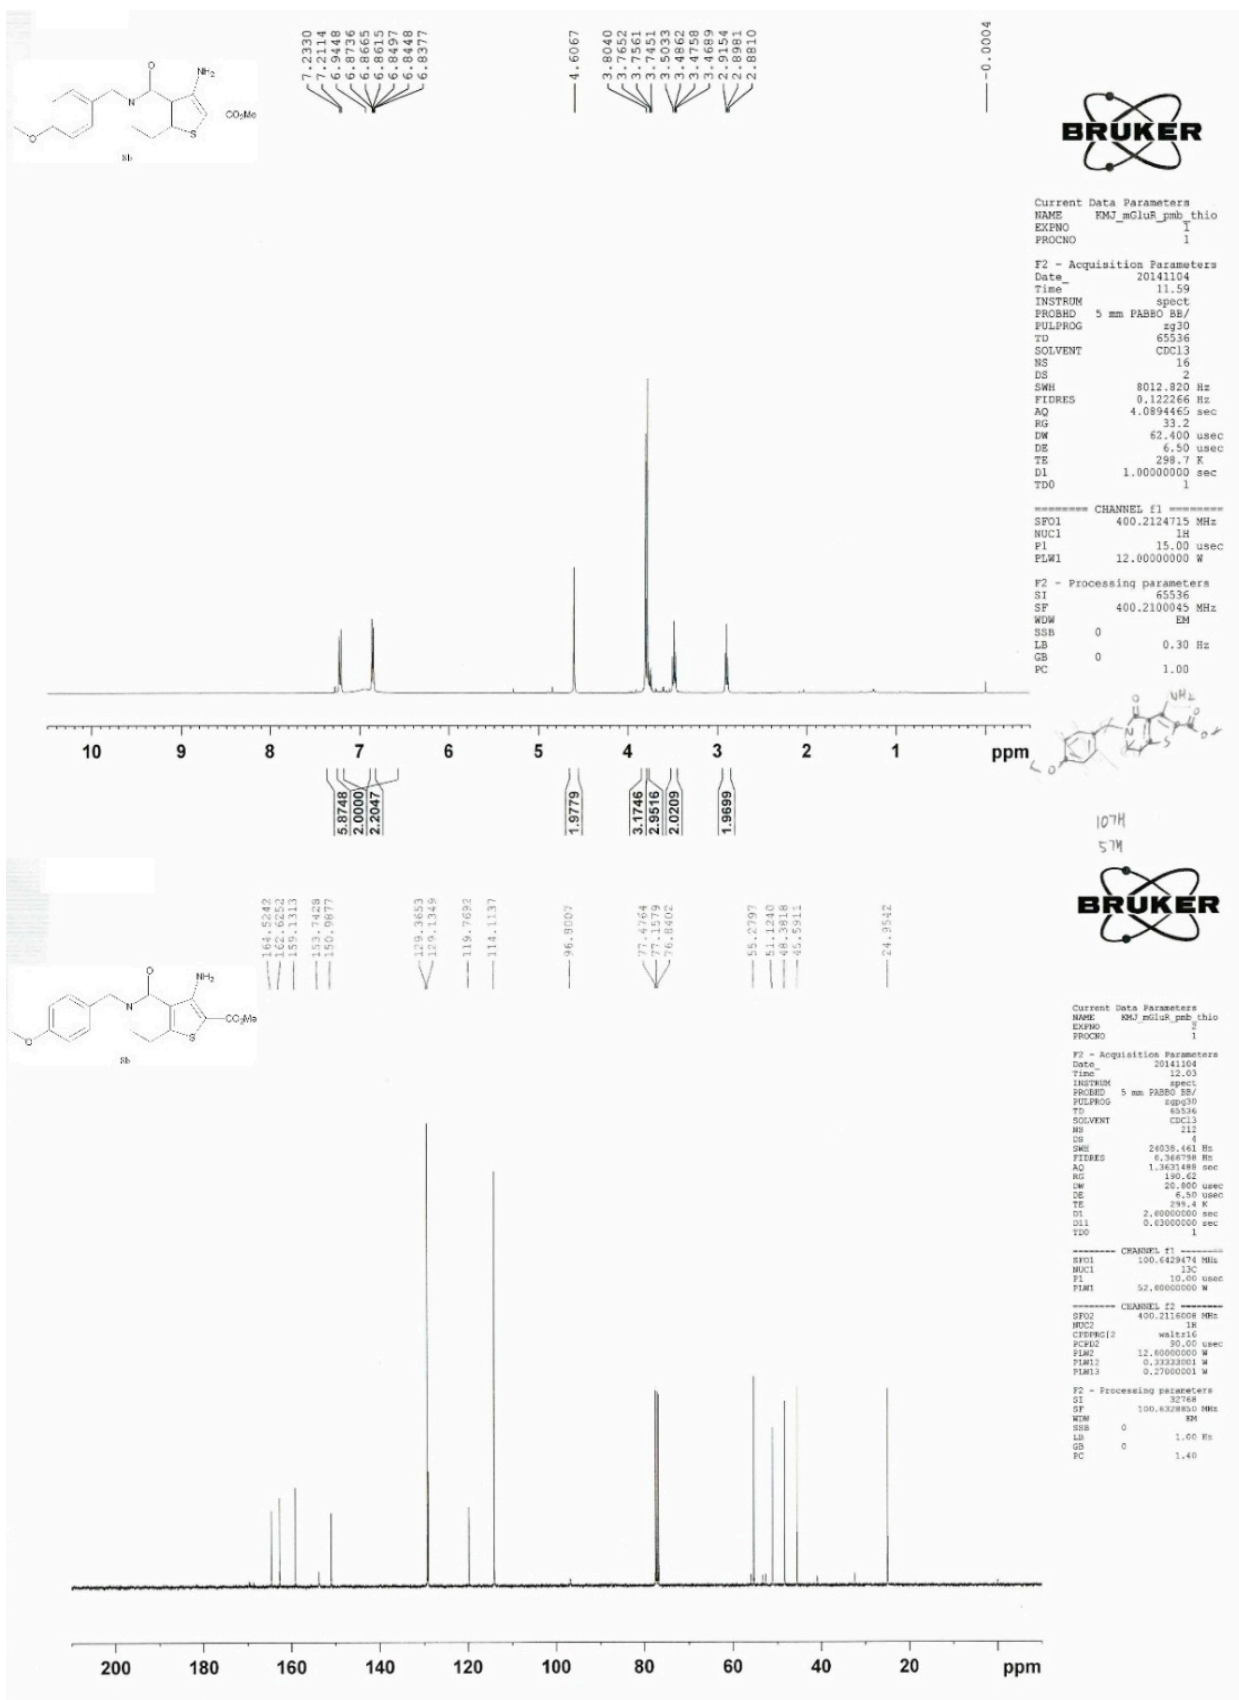

Figure S10. <sup>1</sup>H- (upper) and <sup>13</sup>C-NMR spectra (lower) of compounds 8b.

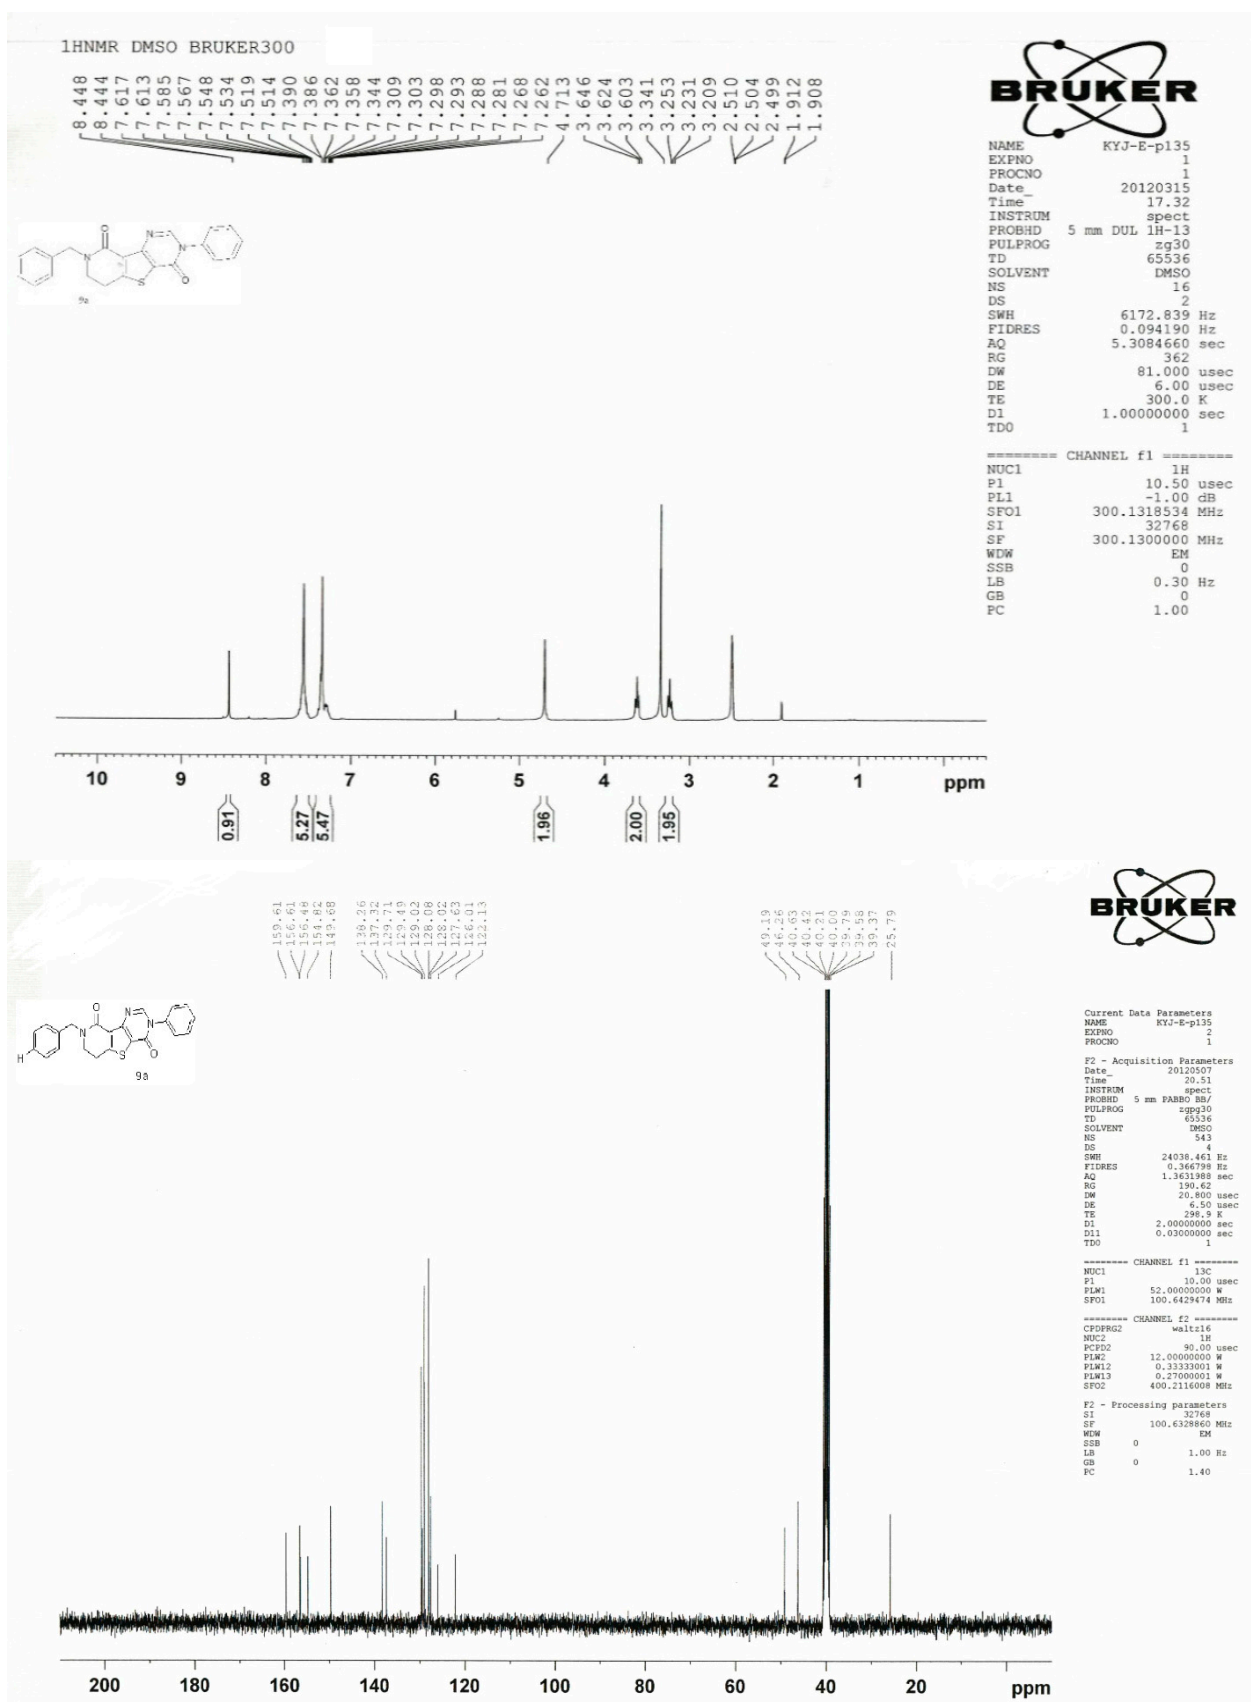

Figure S11. <sup>1</sup>H- (upper) and <sup>13</sup>C-NMR spectra (lower) of compounds 9a.

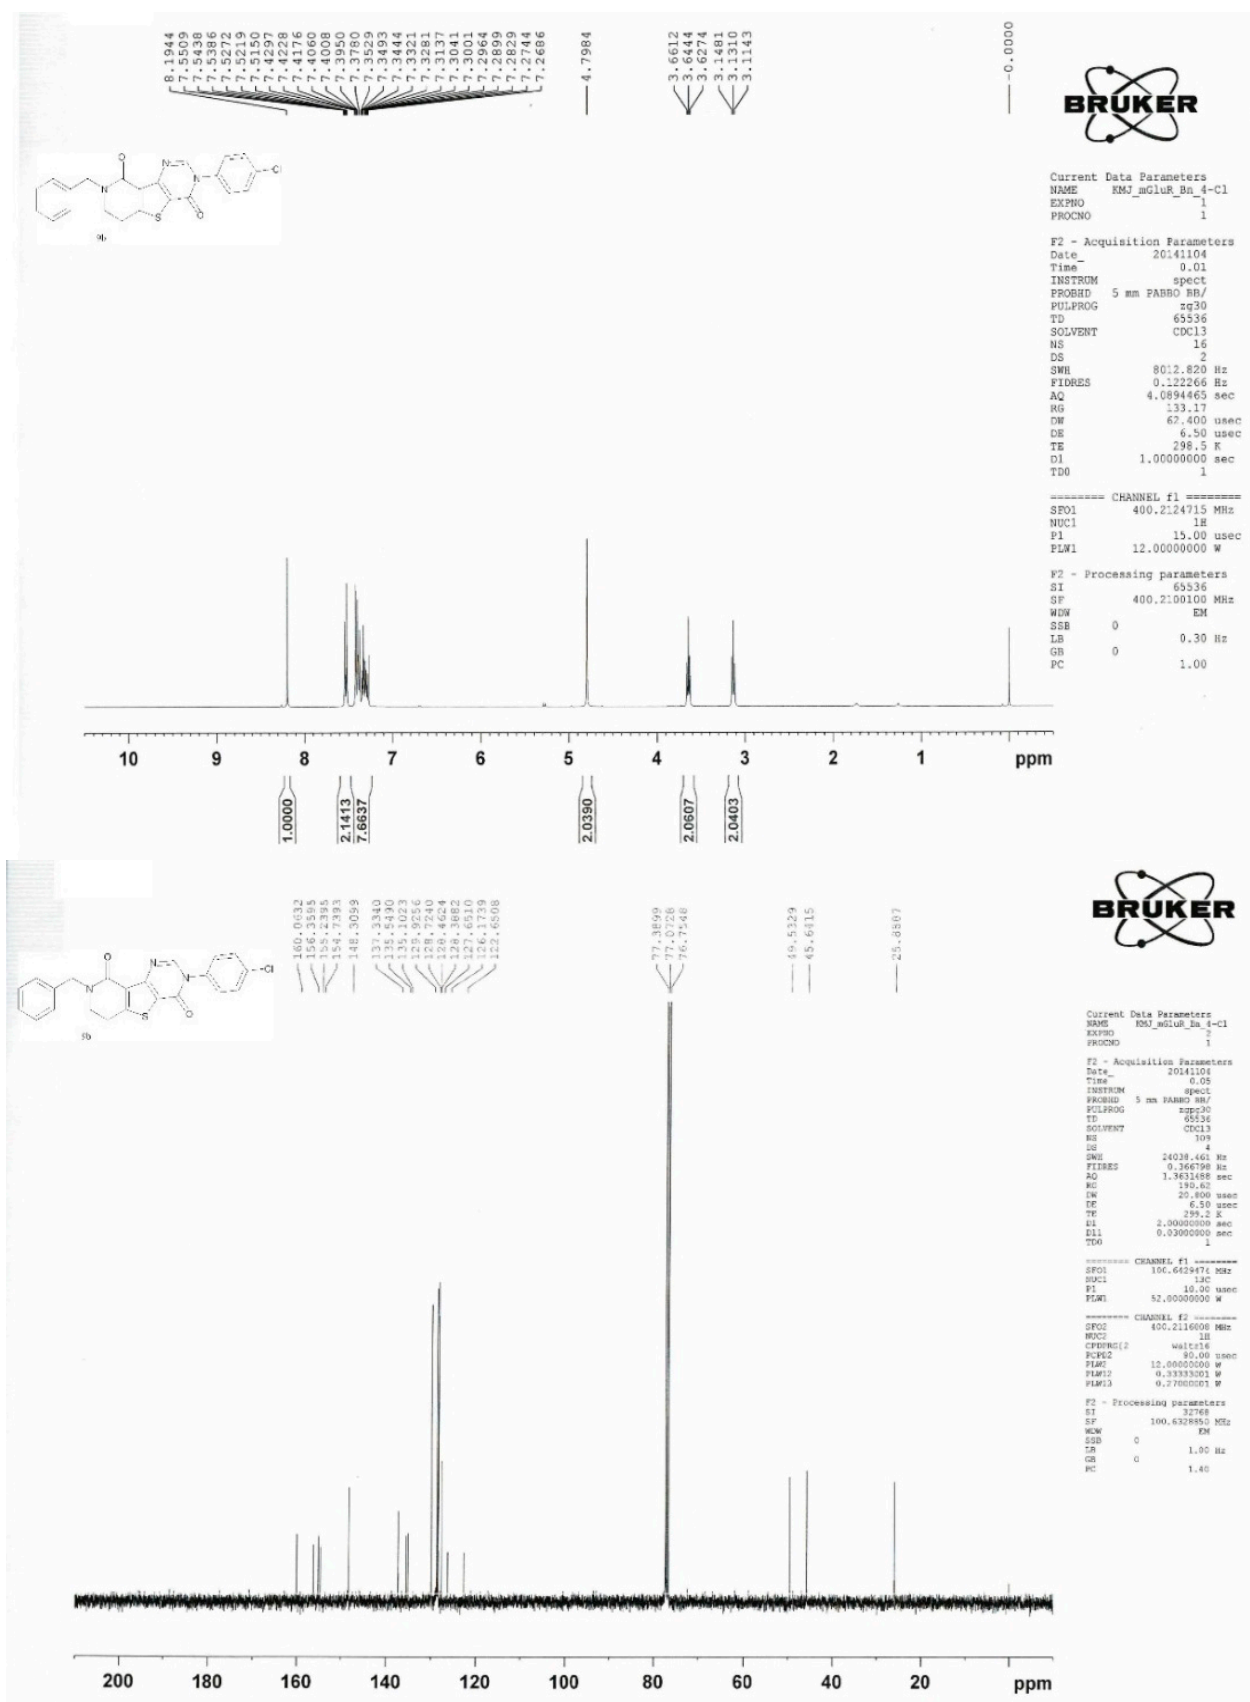

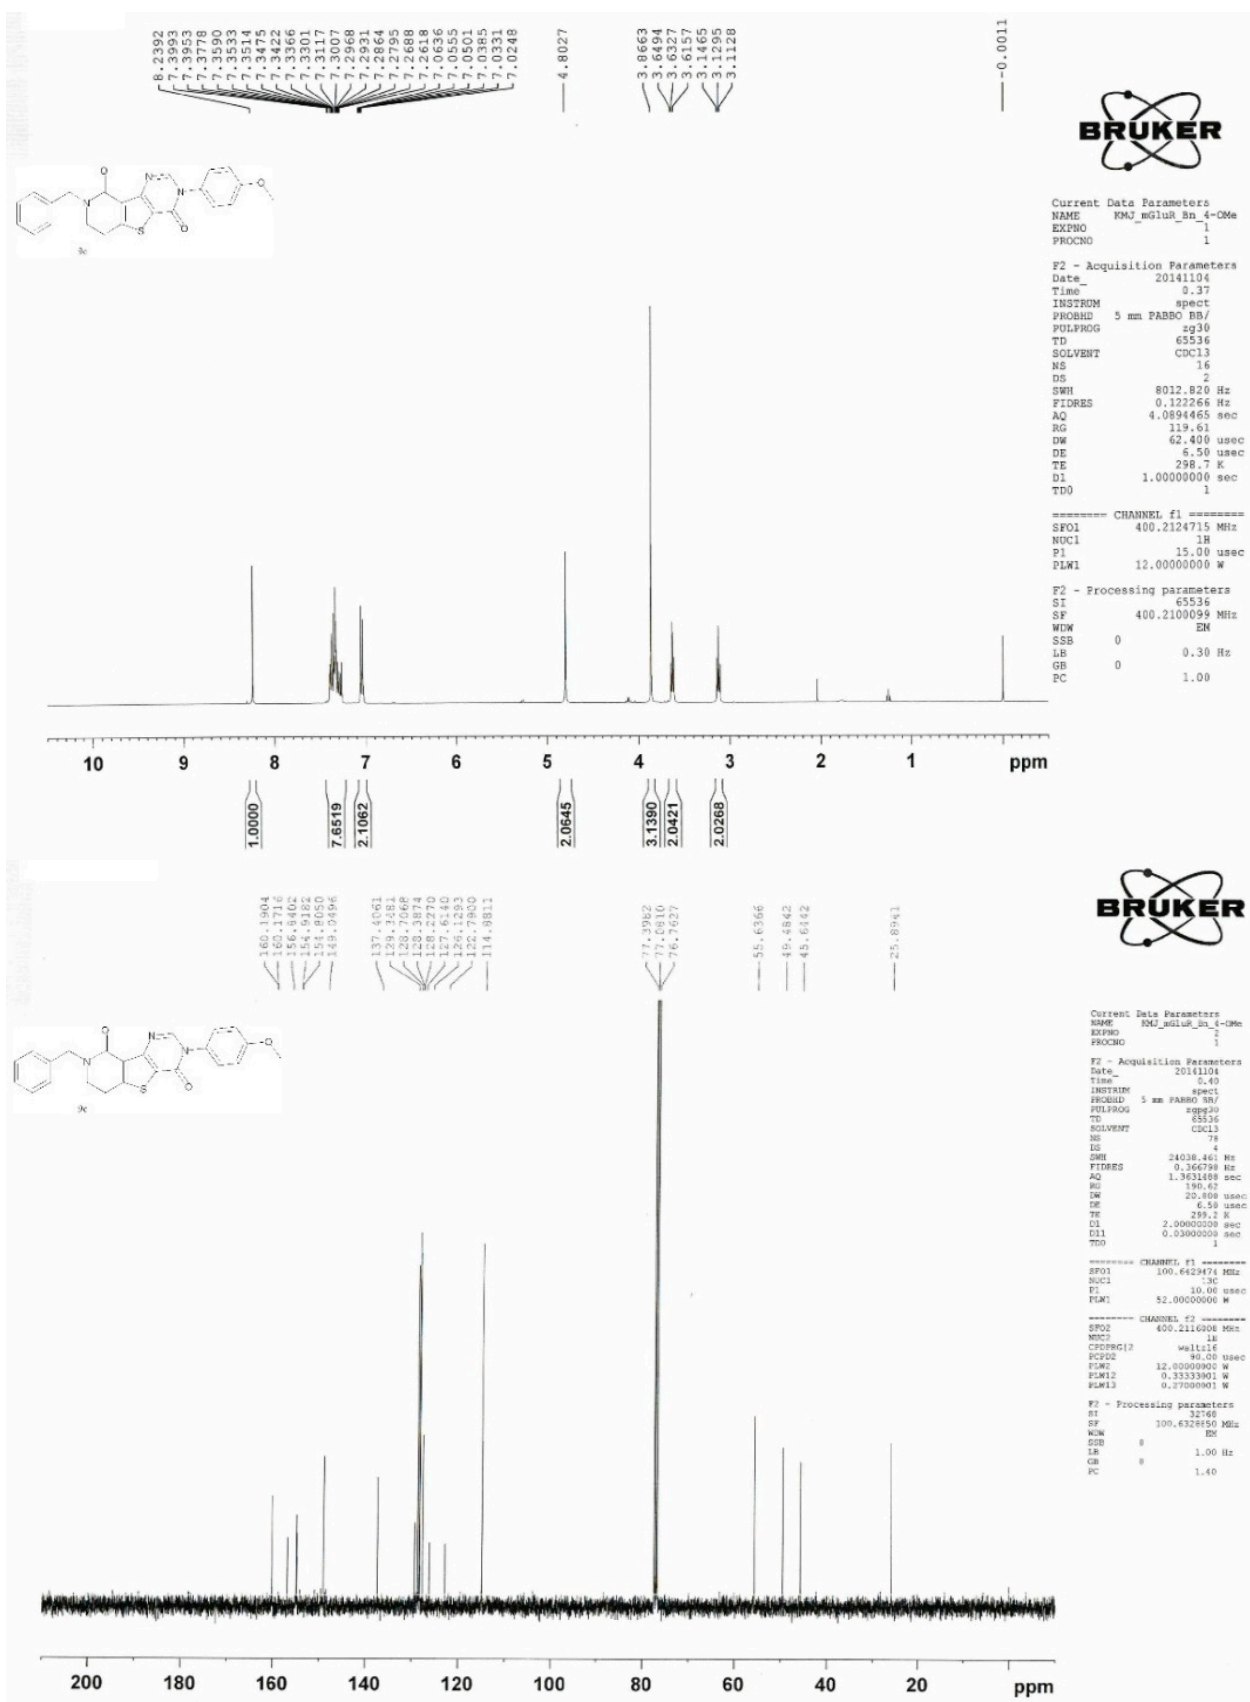

Figure S13. <sup>1</sup>H- (upper) and <sup>13</sup>C-NMR spectra (lower) of compounds 9c.

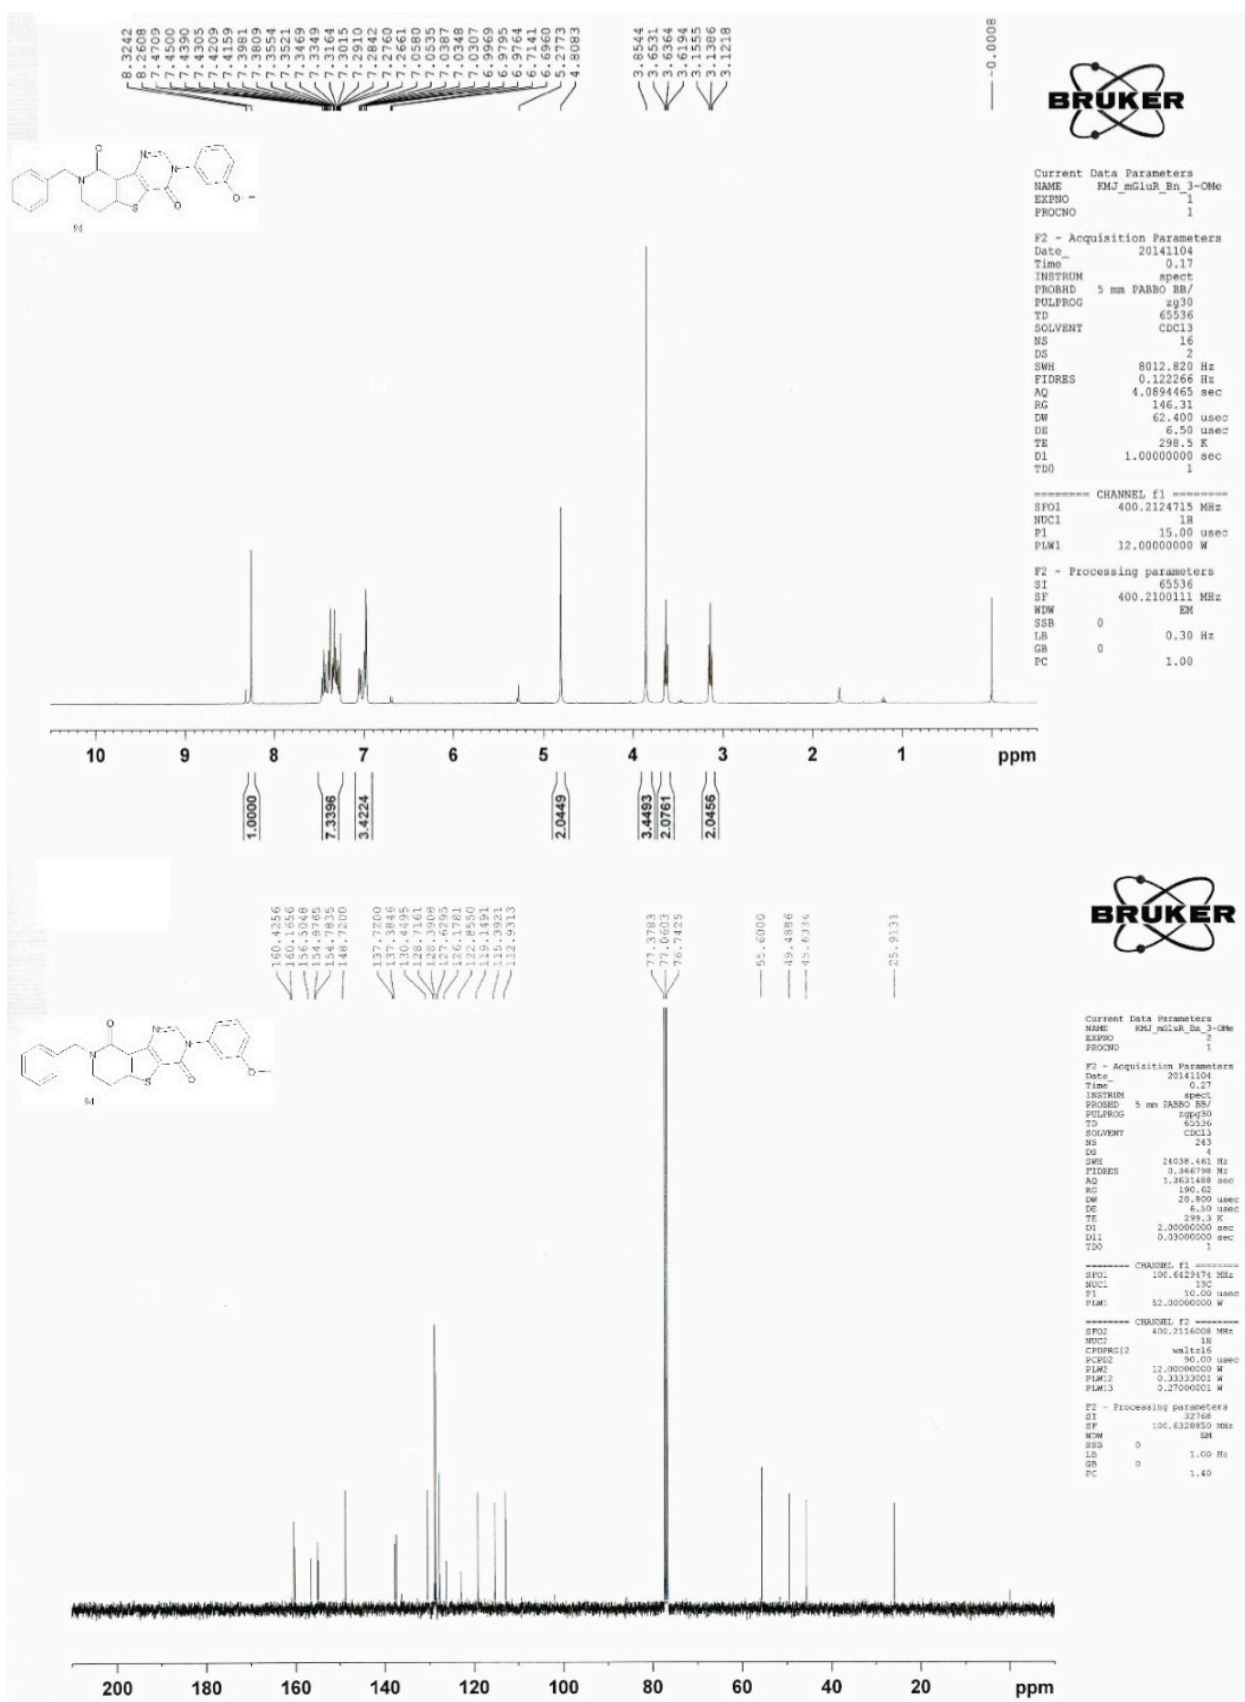

Figure S14. <sup>1</sup>H- (upper) and <sup>13</sup>C-NMR spectra (lower) of compounds 9d.



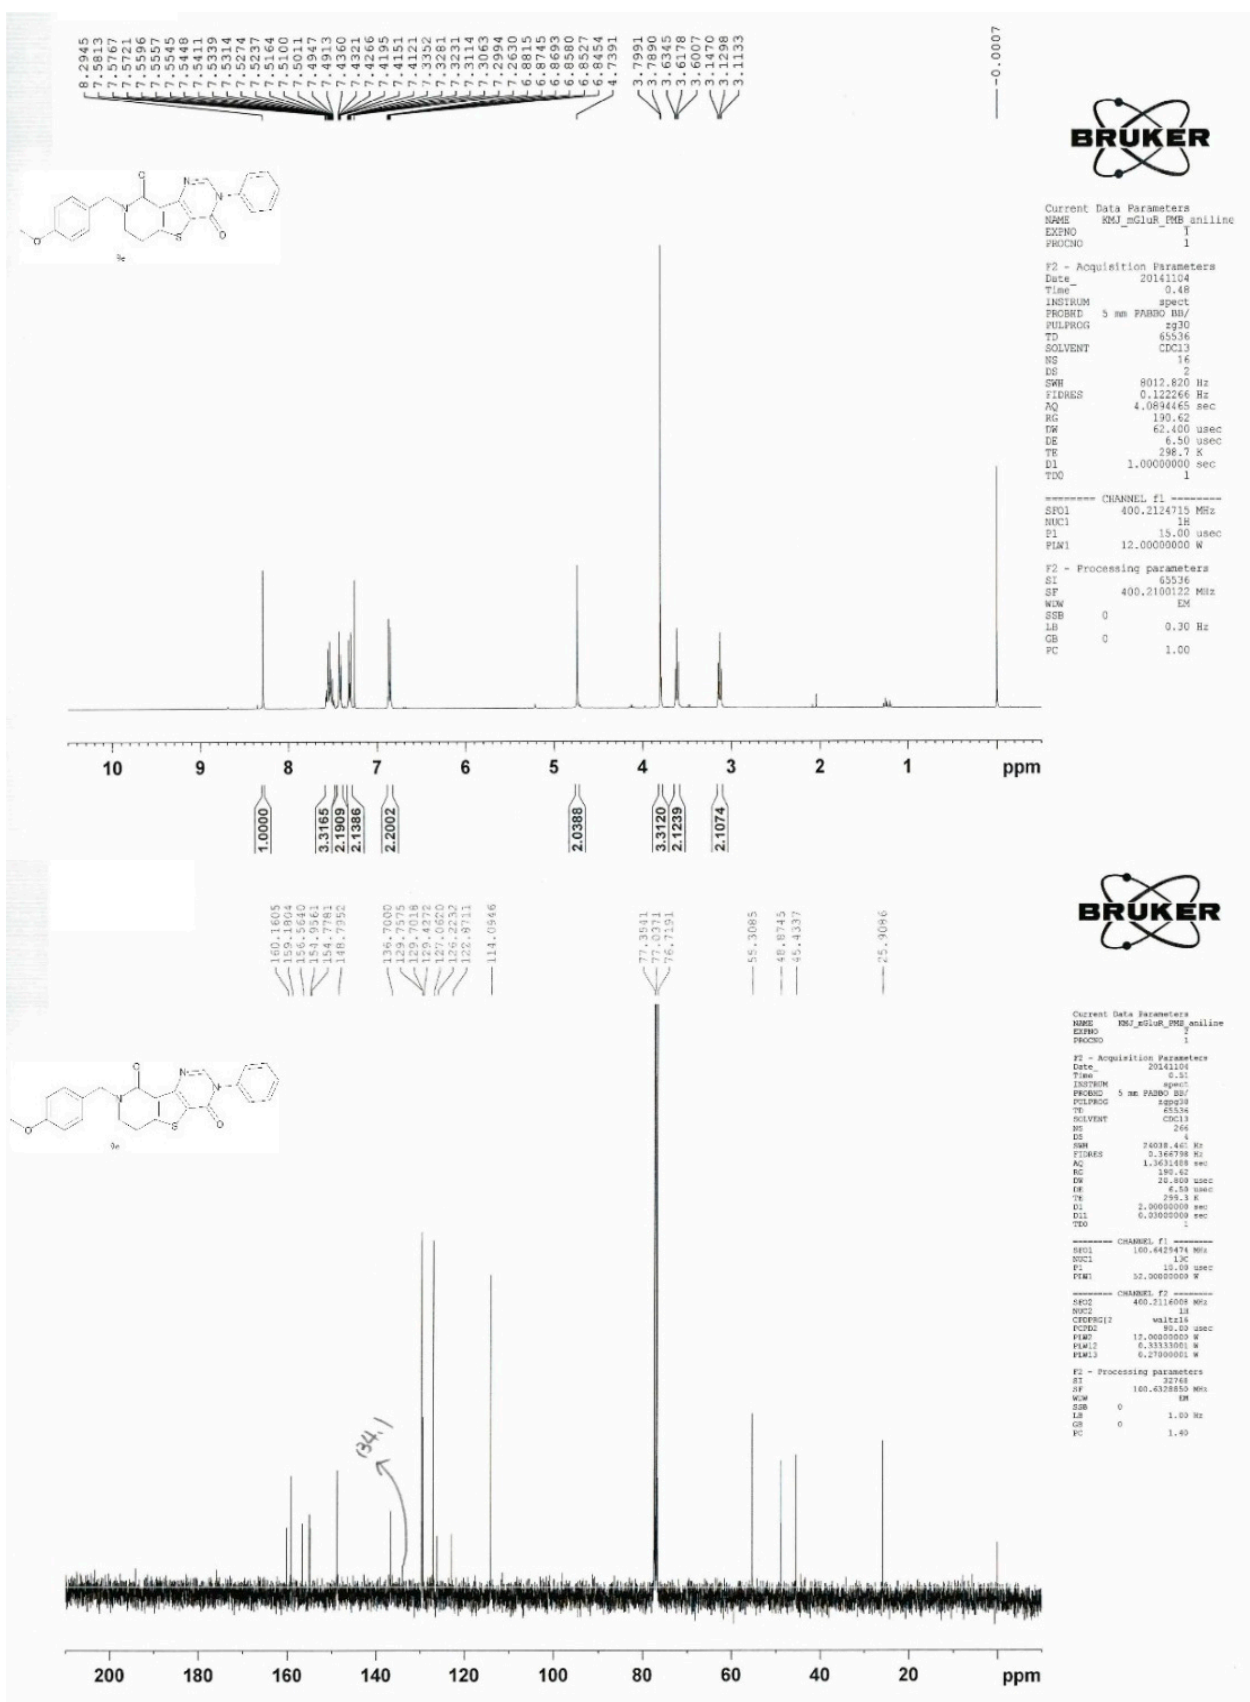

Figure S15. <sup>1</sup>H- (upper) and <sup>13</sup>C-NMR spectra (lower) of compounds 9e.

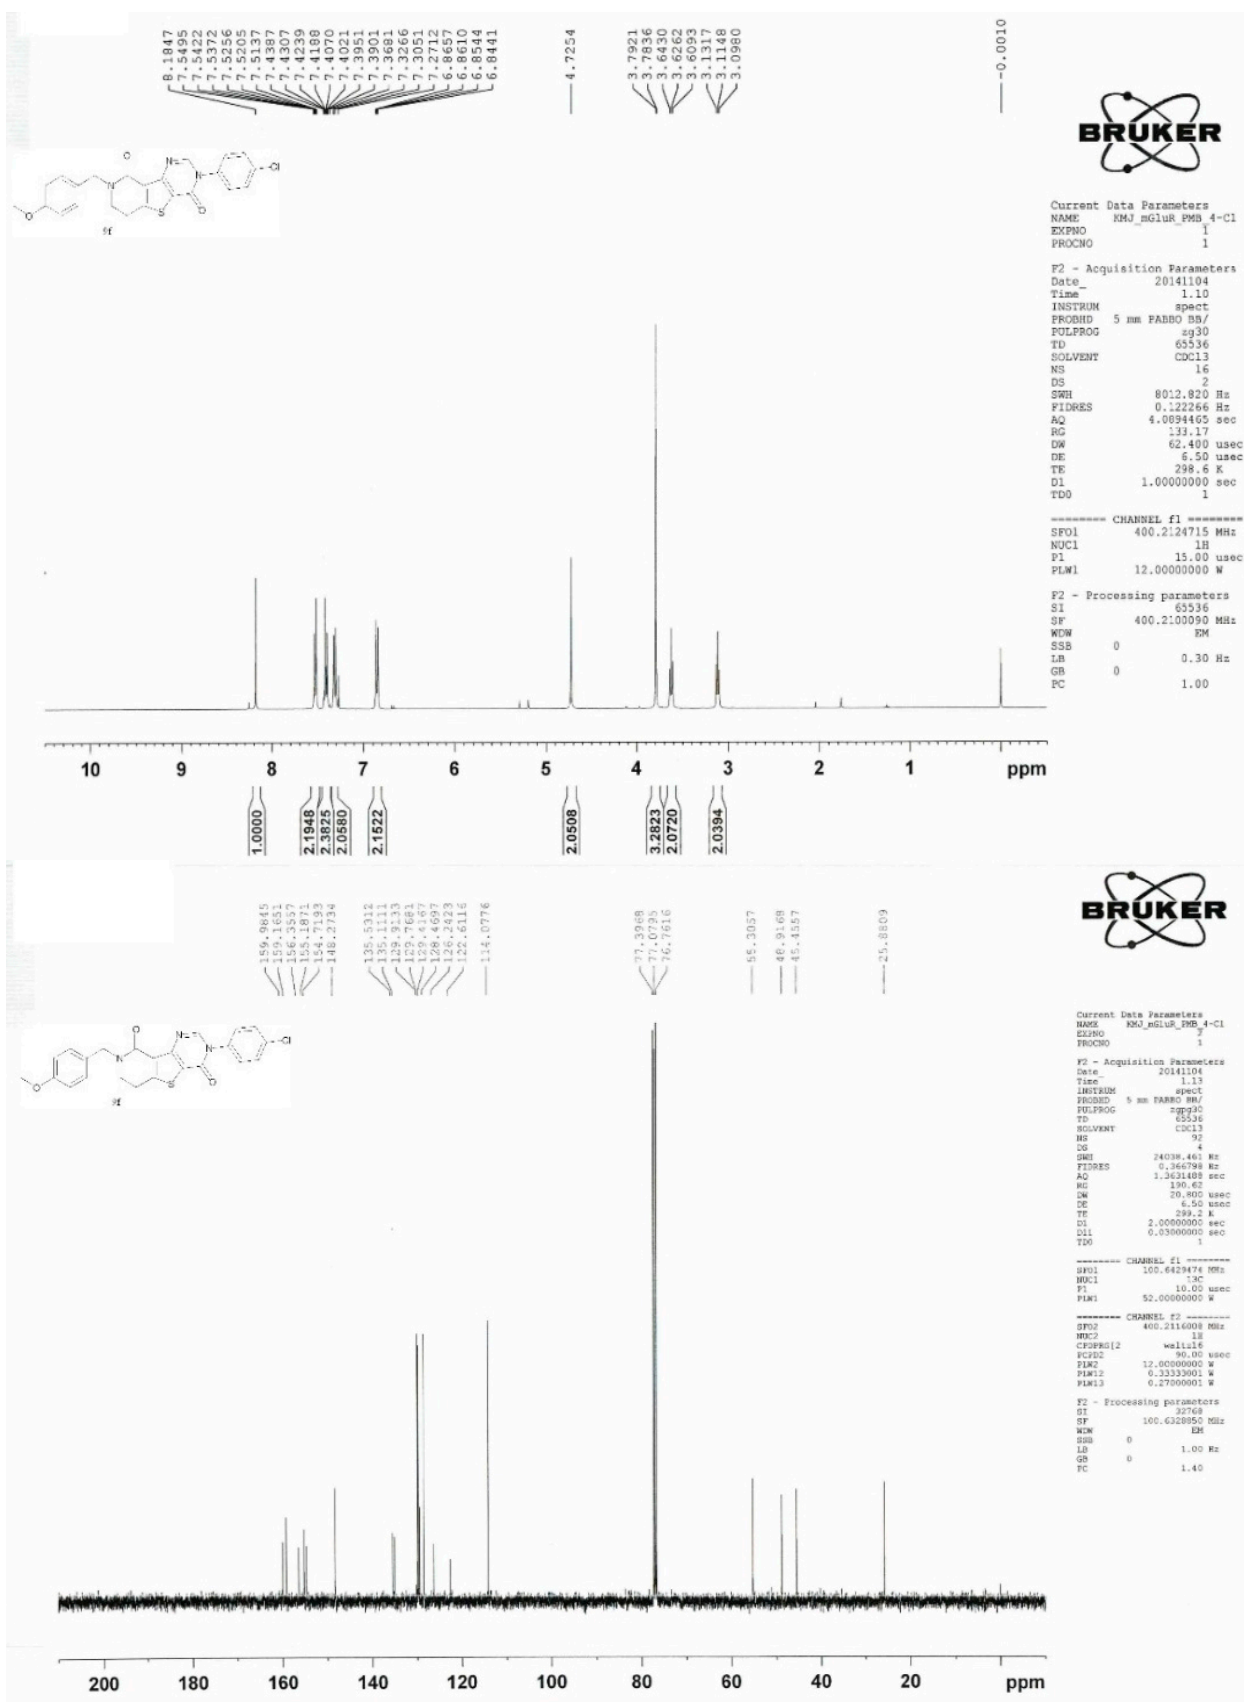

Figure S16. <sup>1</sup>H- (upper) and <sup>13</sup>C-NMR spectra (lower) of compounds 9f.

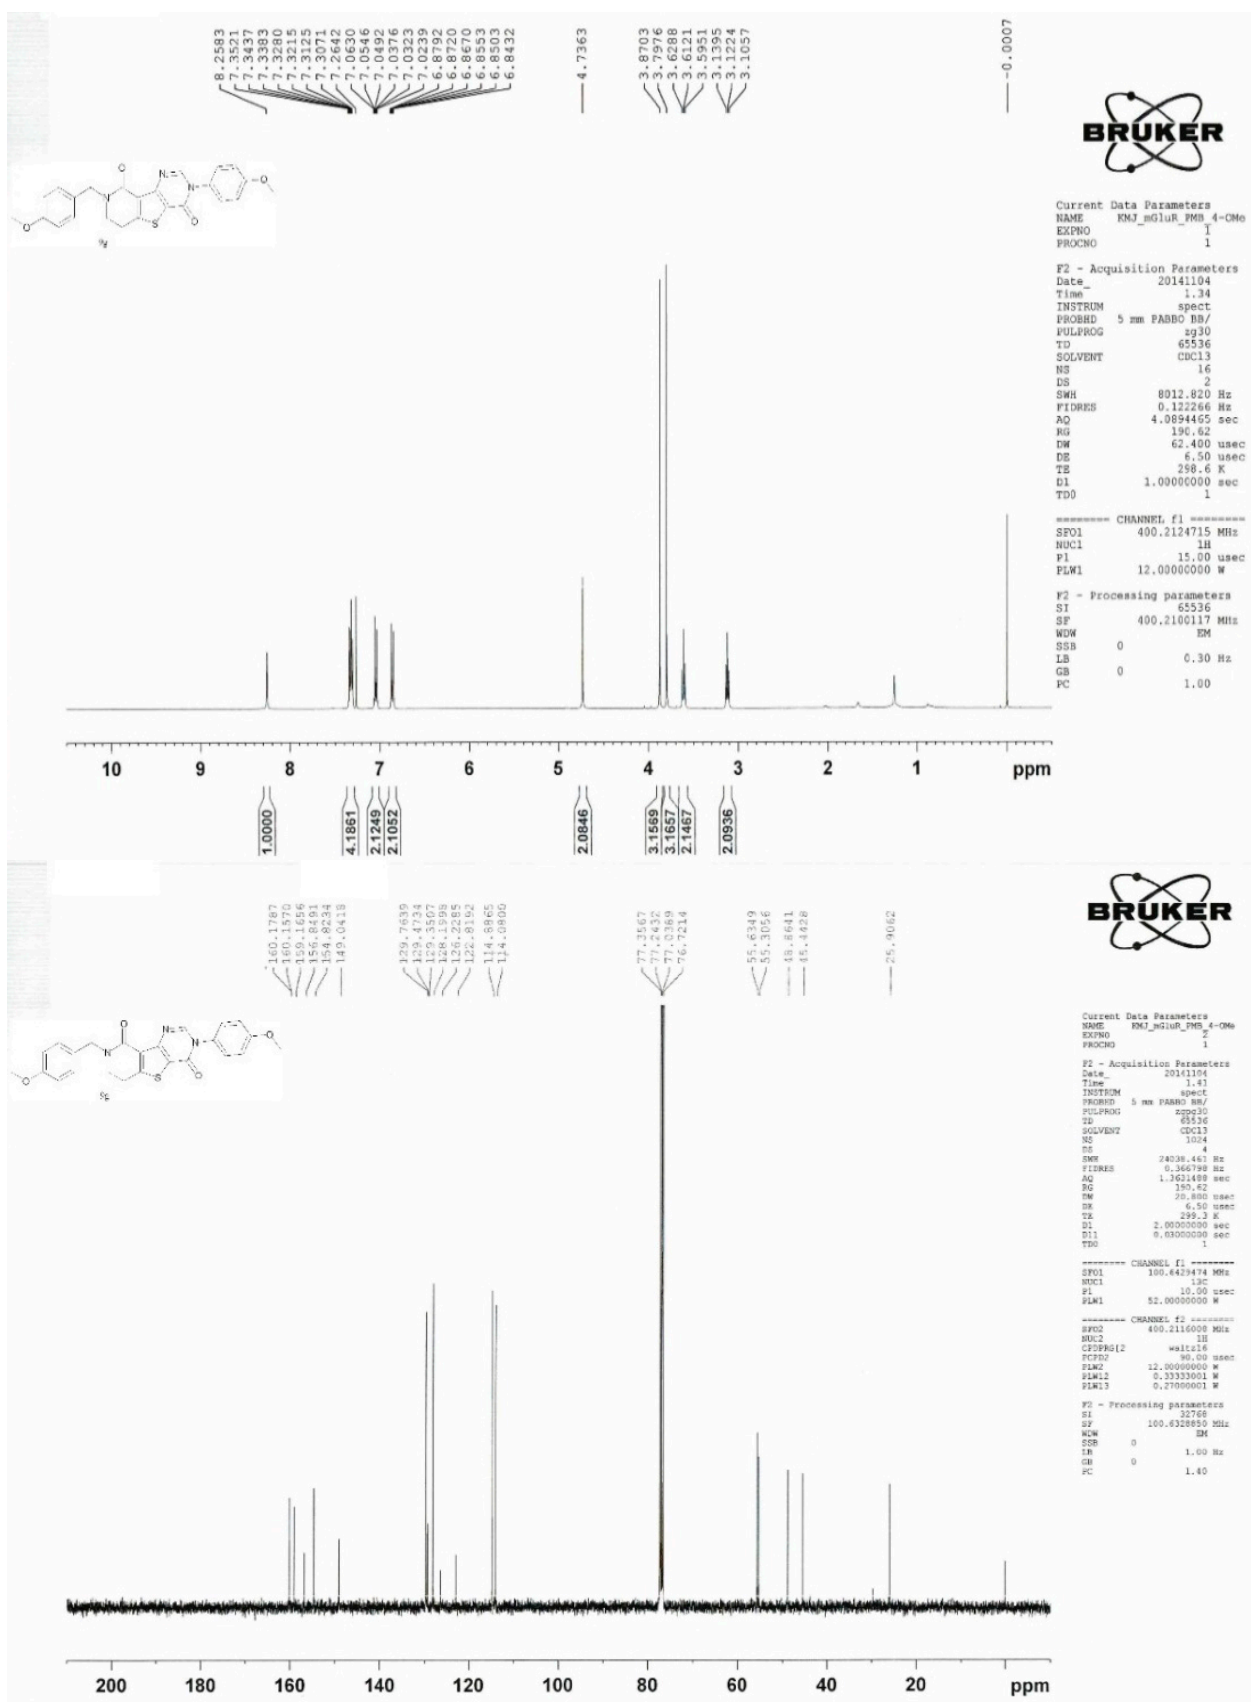

**Figure S17. <sup>1</sup>H- (upper) and <sup>13</sup>C-NMR spectra (lower) of compounds 9g.**

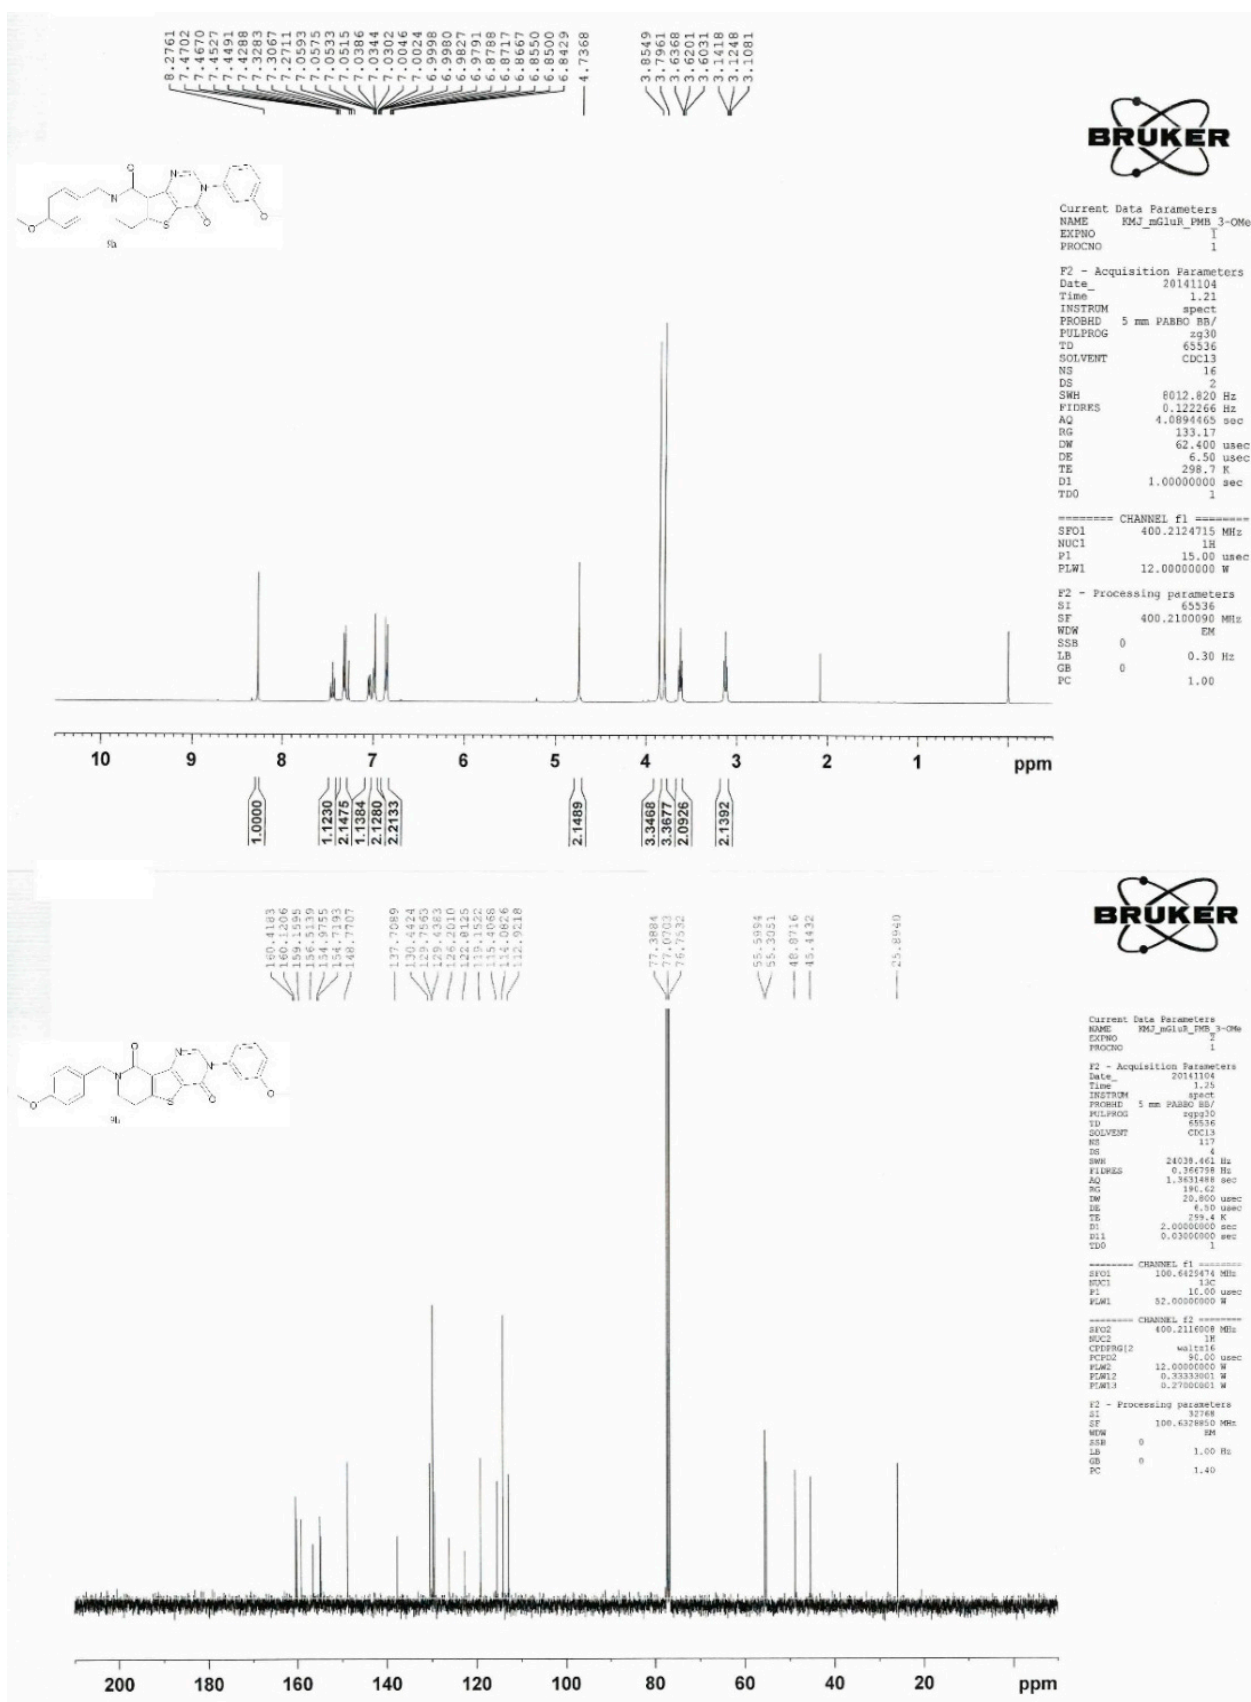

Supplement: s1 [file s1]
